1 Running Head: HIGHLY MULTIPLEXED AMPLICON-BASED PHYLOGENOMICS

2 Title: HiMAP: robust Phylogenomics from Highly Multiplexed Amplicon sequencing

3

4 Julian R. Dupuis<sup>1,2</sup>, Forest T. Bremer<sup>1,2</sup>, Angela Kauwe<sup>1</sup>, Michael San Jose<sup>2</sup>, Luc Leblanc<sup>3</sup>,

5 Daniel Rubinoff<sup>2</sup>, Scott M. Geib<sup>1\*</sup>

6

7 <sup>1</sup>*U.S. Department of Agriculture-Agricultural Research Service, Daniel K. Inouye U.S. Pacific*

8 *Basin Agricultural Research Center, Hilo, HI 96720, USA*

9 <sup>2</sup>*Department of Plant and Environmental Protection Services, University of Hawaii at Manoa,*

10 *Honolulu, HI 96822, USA*

11 <sup>3</sup>*Department of Plant, Soil and Entomological Sciences, University of Idaho, Moscow, ID 83844*

12 *\*Corresponding author: [scott.geib@ars.usda.gov](mailto:scott.geib@ars.usda.gov), phone: (808) 959-4335, fax: (808) 959-5470,*

13 *address: USDA-ARS DKI-PBARC, 64 Nowelo Street, Hilo, Hawaii, USA 96720*

14

15 ABSTRACT

16 High-throughput sequencing has fundamentally changed how molecular phylogenetic datasets  
17 are assembled, and phylogenomic datasets commonly contain 50-100-fold more loci than those  
18 generated using traditional Sanger-based approaches. Here, we demonstrate a new approach for  
19 building phylogenomic datasets using single tube, highly multiplexed amplicon sequencing,  
20 which we name HiMAP (Highly Multiplexed Amplicon-based Phylogenomics), and present  
21 bioinformatic pipelines for locus selection based on genomic and transcriptomic data resources  
22 and post-sequencing consensus calling and alignment. This method is inexpensive and amenable  
23 to sequencing a large number (hundreds) of taxa simultaneously, requires minimal hands-on time  
24 at the bench (<1/2 day), and data analysis can be accomplished without the need for read  
25 mapping or assembly. We demonstrate this approach by sequencing 878 amplicons in single  
26 reactions for 82 species of tephritid fruit flies across seven genera (384 individuals), including  
27 some of the most economically-important agricultural insect pests. The resulting dataset  
28 (>150,000 bp concatenated alignment) contained >40,000 phylogenetically informative  
29 characters, and although some discordance was observed between analyses, it provided  
30 unparalleled resolution of many phylogenetic relationships in this group. Most notably, we found  
31 high support for the generic status of *Zeugodacus* and the sister relationship between *Dacus* and  
32 *Zeugodacus*. We discuss HiMAP, with regard to its molecular and bioinformatic strengths, and  
33 the insight the resulting dataset provides into relationships of this diverse insect group.  
34 Keywords: systematics, phylogenetics, high-throughput sequencing, Tephritidae, Bactrocera

## 35 INTRODUCTION

36 High throughput sequencing has transformed the status quo methodologies for many  
37 biological disciplines, and phylogenomics is no exception (Lemmon and Lemmon 2013,  
38 McCormack, *et al.* 2013). Although whole-genome phylogenies are still out of reach for most  
39 non-model systems, targeted and reduced representation sequencing approaches (“genomic  
40 partitioning”) can generate datasets that are orders of magnitude larger than “traditional” Sanger  
41 sequencing-based molecular phylogenetic datasets. The sheer size of these targeted genomic  
42 datasets provides unprecedented resolution into phylogenetic relationships (Blaimer, *et al.* 2015,  
43 Leache, *et al.* 2015, Prum, *et al.* 2015, Dupuis, *et al.* 2017), particularly when the methodological  
44 and analytical difficulties of such large datasets are considered (Philippe, *et al.* 2011, Kumar, *et*  
45 *al.* 2012, Xi, *et al.* 2015). The various approaches for genomic partitioning have their own  
46 strengths and weaknesses (reviewed in McCormack, *et al.* (2013) and Lemmon and Lemmon  
47 (2013)), including cost, phylogenetic depth (species-level or deeper relationships), the number of  
48 individuals to be sequenced, analytical limitations, and resulting data type and locus length  
49 (single nucleotide polymorphism (SNP) vs. sequence data). For example, restriction-site  
50 associated DNA sequencing (RAD-seq) provides a cost-effective approach for sequencing  
51 hundreds of individuals, but is limited to relatively recent scales of divergence (due to restriction  
52 enzyme site variation), and SNP-based or short sequence-based (generally <100 bp) datasets that  
53 can limit appropriate analyses (Leache, *et al.* 2015, DaCosta and Sorenson 2016, Dupuis, *et al.*  
54 2017). On the other hand, transcriptome-based approaches can generate large datasets of long  
55 sequence-based loci, but become expensive with more than a few dozen samples and require  
56 high quality RNA input, which is often limiting (Hedin, *et al.* 2012, Johnson, *et al.* 2013,  
57 Kawahara and Breinholt 2014).

58           For generating sequence-based phylogenomic datasets with long loci, sequence capture  
59 approaches (also called “target enrichment” or “hybrid enrichment”) are at the forefront of the  
60 field. Variations of sequence capture, such as anchored hybrid enrichment (AHE: Lemmon, *et al.*  
61 2012) and the use of ultra-conserved elements (UCEs: Faircloth, *et al.* 2012b), use a set of  
62 modified oligo probes to capture genomic DNA of interest. Particularly in the early stages of  
63 these methods, probe sets were quite expensive; as a way to make these approaches more  
64 economically feasible, probe sets were often developed for order-level or higher groups of  
65 organisms and shared by multiple experiments (e.g. Hymenoptera (Blaimer, *et al.* 2015,  
66 Faircloth, *et al.* 2015, Blaimer, *et al.* 2016a), Amniota (Faircloth, *et al.* 2012b, Ruane and Austin  
67 2017), Vertebrata (Lemmon, *et al.* 2012, Brandley, *et al.* 2015, Peloso, *et al.* 2016)), and these  
68 higher-level probe sets continue to be used for both deep- and shallow-scale phylogenomics.  
69 Library preparation for these methods involve several main steps including  
70 shearing/fragmentation, sequencing library construction (adapter addition), enrichment/sequence  
71 capture, and final pooling and quantification, and generally take multiple days of bench time.  
72 Most studies have targeted <100 specimens (e.g. Lemmon, *et al.* 2012, McCormack, *et al.* 2012,  
73 Faircloth, *et al.* 2013, Hedtke, *et al.* 2013, Blaimer, *et al.* 2016a, Hamilton, *et al.* 2016, Hosner,  
74 *et al.* 2016, Breinholt, *et al.* 2017), however, datasets sampling 100-200 specimens have also  
75 been generated (e.g. Prum, *et al.* 2015, Moyle, *et al.* 2016, Branstetter, *et al.* 2017a, Branstetter,  
76 *et al.* 2017b).

77           Here we present a novel and cost-effective approach for generating phylogenomic  
78 datasets of hundreds to thousands of genes and hundreds of individuals using amplicon  
79 sequencing based on highly multiplexed polymerase chain reaction (PCR). Multiplex PCR  
80 simultaneously targets multiple loci by including multiple primer pairs in a single reaction

81 (Chamberlain, *et al.* 1988), but its use for developing high throughput sequencing libraries has  
82 been hindered by many challenges. Primary among these are the difficulty in amplifying more  
83 than a few dozen targets, time-intensive optimization of reaction conditions, uneven and off-  
84 target amplification, and formation of primer dimers (Edwards and Gibbs 1994, Markoulatos, *et*  
85 *al.* 2002, Fan, *et al.* 2006, Turner, *et al.* 2009). In a phylogenomic context, these challenges can  
86 be exacerbated by sequence variation at priming sites and target length variation (Lemmon and  
87 Lemmon 2013), thus limiting phylogenetic applications of multiplex PCR to relatively shallow  
88 time scales and few targets (e.g. Phuc, *et al.* 2003, Stiller, *et al.* 2009, Doumith, *et al.* 2012,  
89 Wielstra, *et al.* 2014). Amplicon sequencing has been used to generate moderate sized  
90 phylogenomic datasets, but has generally relied on singleplex, barcoded PCR products being  
91 pooled into high throughput sequencing libraries (O'Neill, *et al.* 2013, Barrow, *et al.* 2014), or  
92 microfluidic systems that facilitate automated amplification of singleplex or multiplex reactions  
93 (Richardson, *et al.* 2012, Gostel, *et al.* 2015, Uribe-Convers, *et al.* 2016).

94 We adapt a new library preparation procedure originally developed for human cancer  
95 research, and demonstrate its first use in a phylogenomic context by sequencing 878 conserved  
96 exons for 384 specimens of tephritid fruit flies (Diptera: Tephritidae). Tephritidae includes some  
97 of the most economically important pest species in the world (White and Elson-Harris 1992,  
98 Vargas, *et al.* 2015); despite large research efforts for control and management of these pests,  
99 many morphologically-cryptic species complexes remain uninvestigated and there is a general  
100 lack of consensus regarding main relationships between genera (Hendrichs, *et al.* 2015, Virgilio,  
101 *et al.* 2015, Schutze, *et al.* 2016). We focus our specimen sampling on genera across Tephritidae  
102 that contain some of the most economically important pests, including *Anastrepha*, *Bactrocera*,  
103 *Ceratitis*, and *Zeugodacus*, as well as on the morphologically-cryptic complexes within

104 *Bactrocera* and *Zeugodacus*. Our 878-exon panel uses a single oligonucleotide primer pool for  
105 all of these genera, and we demonstrate that this approach remedies virtually all of the main  
106 difficulties in using multiplex PCR for high-throughput sequencing library construction (Turner,  
107 *et al.* 2009, Lemmon and Lemmon 2013), particularly for shallow-mid scale phylogenies. This  
108 approach is cost-effective, and library preparation can be accomplished in <1/2 day. The  
109 approach developed here for data processing to call consensus sequences is rapid and  
110 straightforward, avoids read mapping and assembly, and can be accomplished using a basic  
111 laptop or desktop computer. We name this approach HiMAP (Highly Multiplexed Amplicon-  
112 based Phylogenomics).

113

## 114 METHODS

### 115 Overview of end-to-end HiMAP approach

116 We present an end-to-end concept for completing a HiMAP project, including methods  
117 for locus selection, primer design, target amplification, sequencing, and post-sequencing data  
118 processing and analysis (henceforth we use “data processing” to refer to the steps going from  
119 raw sequence data to input files for phylogenetic analyses). The locus selection and data  
120 processing pipelines are summarized in Figure 1 and Figure 2, respectively. We demonstrate this  
121 with a focus on a moderate phylogenetic time scale, using genera in Tephritidae diverging 65-  
122 100 million years ago (Krosch, *et al.* 2012, Caravas and Friedrich 2013), but a deeper or more  
123 shallow focus could be taken, depending on the research question. We use thirteen genomic and  
124 transcriptomic data sources for locus selection, spanning three genera. However, the pipeline  
125 presented here is amenable to fewer or more data sources, as long as one of them has relatively  
126 high quality genome assembly and structural annotation of protein coding regions. Additionally,

127 loci could be selected with other methods and integrated into the later HiMAP steps. Wet lab  
128 requirements are standard, using common equipment found in most molecular labs  
129 (thermocycler, fluorometer, magnetic stand). Sequencing depth needed to generate a high-quality  
130 consensus for several hundred loci across hundreds of species can be reached with low-cost  
131 bench-top sequencing (e.g. Illumina MiSeq), and computational requirements for post-  
132 sequencing data processing (going from raw FASTQ files to aligned consensus sequences) are  
133 minimal, and could be completed using a laptop or desktop computer. Finally, the output  
134 formatting is standard multi-FASTA format, so can be readily used or easily re-formatted for  
135 routine phylogenetic analyses. Details of bioinformatic pipelines (including locus selection,  
136 amplicon/primer filtering, and post-sequencing data processing) and additional code used here  
137 can be found at <https://github.com/popphylotools/HiMAP>.

138

## 139 Locus Selection Pipeline

### 140 *1. Ortholog Prediction*

141 Our locus selection pipeline begins with ortholog prediction from existing genomic and  
142 transcriptomic resources in the focal group. For this study, we used data from 13 species  
143 including *Anastrepha* (three species), *Bactrocera* (nine species), and *Ceratitidis* (one species):  
144 *Anastrepha fraterculus* (Wiedemann 1830), *A. obliqua* (Macquart 1835), *A. suspensa* (Loew  
145 1862), *Bactrocera correcta* (Bezzi 1916), *Zeugodacus cucurbitae* (Coquillet 1899), *B. dorsalis*  
146 (Hendel 1912), *B. jarvisi* (Tryon 1927), *B. latifrons* (Hendel 1912), *B. minax* (Enderlein 1920),  
147 *B. oleae* (Rossi 1790), *B. tryoni* (Froggatt 1897), *B. zonata* (Saunders 1841), and *Ceratitidis*  
148 *capitata* (Wiedemann 1824). For three species (*A. obliqua*, *B. jarvisi*, and *B. minax*) we  
149 downloaded sequence read archives from the National Center for Biotechnology Information and

150 conducted *de novo* transcriptome assembly using the trinity pipeline (Grabherr, *et al.* 2011), as  
151 described in Sim, *et al.* (2015). For two species (*A. suspensa* and *B. tryoni*) we used GeMoMa  
152 (Keilwagen, *et al.* 2016) with default parameters to predict gene models based on other  
153 phylogenetically proximate species' transcriptomes (*A. fraterculus* and *B. latifrons*,  
154 respectively). The quality of these data sources ranged from that of chromosome-scale genome  
155 assemblies (*Z. cucurbitae*: Sim and Geib (2017)) and high quality transcriptomes (generated  
156 from all life stages, comprehensive filtering of erroneous transcripts/partial sequences, etc.:  
157 Calla, *et al.* (2014), Geib, *et al.* (2014), Sim, *et al.* (2015)) to genome assemblies from relatively  
158 low coverage resequencing experiments or tissue specific RNA-sequencing experiments (e.g.  
159 Rezende, *et al.* (2016), Fig. 1, details for all data sources in Table S1). Later steps in our locus  
160 selection pipeline depend on trustworthy genome-based annotations, specifically used to define  
161 exon/intron boundaries, so we identified four species (*B. dorsalis*, *B. oleae*, *C. capitata* and *Z.*  
162 *cucurbitae*) as having high quality genomic annotations based on the integration of homology-  
163 based and evidence-based predictions of gene function (e.g. Papanicolaou, *et al.* 2016, Sim and  
164 Geib 2017). We use “high quality annotations” to describe these four species in later steps.

165         For each gene locus for each species, we identified a single transcript with the longest  
166 open reading frame to be used as a representative protein sequence. We used OrthoMCL (Li, *et*  
167 *al.* 2003, Chen, *et al.* 2006, Chen, *et al.* 2007) with default parameters to predict orthologous  
168 groups using these longest representative proteins of each predicted gene across all species. We  
169 used `select_clusters_v2.pl` from Hahn, *et al.* (2014) to filter ortholog groups to those  
170 with a minimum of eight species that were single-copy (maximum median (`--max_median`)  
171 and mean number (`--max-mean`) of sequences per taxon = 1). In addition, orthologs had to be  
172 present in all of the four species with high quality annotations.



## 173 2. Identifying Conserved Exons

174 From the filtered, single-copy orthologs and the corresponding genomes/transcriptomes  
175 (with fasta and generic feature format (gff) files), we developed a bioinformatic pipeline for  
176 target selection to identify conserved single-copy exons. This pipeline functions through a series  
177 of Python scripts and primarily uses Python v3.6 (Python Software Foundation 2017), BioPython  
178 (Cock, *et al.* 2009), SciPy (Jones, *et al.* 2001), NumPy (van der Walt, *et al.* 2011), gffutils (Dale  
179 2013), Pandas (McKinney 2010), GNU parallel (Tange 2011), MAFFT (Katoh and Standley  
180 2013), and TAPIR (Pond, *et al.* 2005, Faircloth, *et al.* 2012a). Using part01 of the HiMAP  
181 pipeline, nucleotide coding sequences (CDSs) corresponding to the single-copy orthologs were  
182 generated for each species based on their gff file. Each CDS consists of multiple exons, and at  
183 exon boundaries we removed the introns, which can vary dramatically in length between species,  
184 and replaced them with strings of 50 Ns. We refer to these concatenated exons and strings of 50  
185 Ns as “padded exons”. The padded exons for these four species were then aligned using the  
186 default L-INS-i algorithm in MAFFT (Katoh and Standley 2013). The presence of these strings  
187 of 50 Ns helped to keep conserved exons together in the alignment (regardless of potentially  
188 widely variable intron sequence), and the script uses the stretches of 50 Ns to compare the start  
189 and stop coordinates of individual exons across the alignment. When all four species’ start and  
190 stop coordinates matched for an exon, that exon alignment (plus the 50 Ns on both the 5’ and 3’  
191 ends) and the full unaligned, nucleotide ortholog sequence of the other species from the ortholog  
192 prediction process was written to a new file. During this step, multiple exon-specific files are  
193 potentially created from each ortholog file (e.g. multiple files would be created for gene-1\_exon-  
194 A, gene-1\_exon-B, gene-2\_exon-A, gene-2\_exon-B, etc.), and these are referred to as “raw  
195 exons”.

196 Raw exons were then aligned using the L-INS-i algorithm in MAFFT. Again, the padding  
197 with 50 Ns facilitated this alignment, as the alignment algorithm prefers to keep these blocks of  
198 Ns together. Preliminary alignments without this padding tended to erroneously break up the  
199 already aligned sequences of the four species with high quality annotations, due to sequence  
200 variation in the (potentially) longer sequences of the other species (which were full length  
201 ortholog sequences). Following this alignment, we filtered exons and discarded those that were <  
202 100 bp long or contained gaps anywhere in their alignment. The remaining exons are presumably  
203 single copy and conserved in terms of length and exon/intron boundaries across all species, and  
204 served as the input for primer design steps. We refer to these as “filtered exons”.

### 205 *3. Putative Primer Design*

206 We used Paragon Genomics’ CleanPlex Custom Panel Design Service (Paragon  
207 Genomics, San Francisco, CA, included in the CleanPlex Targeted Library Kit) to design primers  
208 for the filtered exons. This process accounts for standard primer selection parameters (primer  
209 size, melting temperature, etc.) as well as amplicon compatibility (interactions between primers  
210 for different amplicons), and we adapted the process in two ways. First, the filtered exons were  
211 highly variable (e.g. an average of 29.9% of bases were variable across the “all-species” filtered  
212 exons (see below), or qualitatively, every second to fourth base in most alignments), so we  
213 allowed for a single degenerate base to be included in each primer. Second, we wanted to target  
214 exonic regions that could be fully sequenced with a single primer pair utilizing paired-end 2 x  
215 300 bp sequencing (rather than tiling multiple amplicons across an exon), so we set a maximum  
216 amplicon length, including the locus-specific primers, of 450 bp (compared to the previous  
217 maximum length of 300-350 bp). Minimum amplicon length was 125 bp.

218 To serve as an additional filtering metric, we used part02 of the HiMAP pipeline to  
219 calculate phylogenetic informativeness (PI) for each amplicon (here we refer to the amplified  
220 sequence, the sequence in between primers, as “amplicons”) using TAPIR v1.1 (Pond, *et al.*  
221 2005, Faircloth, *et al.* 2012a), which implements the algorithm of Townsend (2007). TAPIR uses  
222 a reference tree to calculate PI, and for this tree we used a Maximum Likelihood (ML) consensus  
223 tree generated from a peptide alignment of the orthologs predicted by OrthoMCL. Again, we  
224 used `select_clusters_v2.pl` to filter orthologs to those that were single-copy and  
225 present in all species, which resulted in 490 orthologs. Each of the orthologs was aligned using  
226 MAFFT (L-INS-i), and the resulting fasta files were concatenated using  
227 `catfasta2phym1.pl` (Nylander 2016), generating an alignment of 302,549 peptides. A ML  
228 tree search was conducted in IQ-TREE v1.4.2 (Nguyen, *et al.* 2015) with 1,000 ultra-fast  
229 bootstrapping replicates (Minh, *et al.* 2013) and 1,000 replicates of the Shimodaira/Hasegawa  
230 approximate likelihood-ratio test (SH-aLRT: Guindon, *et al.* (2010)).

231 TAPIR requires a complete dataset (i.e. no missing individuals for any genes), however  
232 our exon filtering regime only required eight species present per exon. To accommodate this  
233 missing data in our single amplicon alignments, we used the topology generated in the  
234 aforementioned ML consensus tree to fill in any missing individual’s sequence with that of its  
235 closest relative. Although not ideal, this approach is realistic given the variable missingness of  
236 many phylogenetic datasets, and will only underestimate the PI of any given gene (having an  
237 identical sequence to close relatives provides no additional phylogenetic information for that  
238 clade), which is preferred to overestimating PI. With these complete amplicon alignments, we  
239 used TAPIR to calculate PI at six relatively evenly spaced points along the tree, based on branch  
240 length, and averaged those values to provide a single estimate of PI per amplicon.

#### 241 4. Final Amplicon Selection

242 The inclusion of three genera in this locus selection pipeline biases loci to those that are  
243 conserved at this relatively deep, genus-level phylogenetic scale. Given that our main focus and  
244 sampling effort was the genus *Bactrocera*, we wanted to maximize the phylogenetic resolution  
245 within the genus. For this reason, we ran our locus selection pipeline twice: once as described,  
246 starting with 13 species in three genera (“all-species”), and again with only *Bactrocera* species  
247 (“*Bactrocera*-only”). We used the same ortholog prediction results for both runs, so that ortholog  
248 IDs were conserved and we could avoid including duplicate exons in the final amplicon set. The  
249 *Bactrocera*-only procedure was identical to that with all species, except single copy orthologs  
250 were required to have five species to pass filter (instead of eight), three high quality annotations  
251 were used in the padded exon filtering, and filtered exons were required to have five species. We  
252 also used a minimum amplicon length of 175 bp, rather than 125 bp as in the all-species analysis.

253 With the two sets of amplicons (and putative primers), we selected our final amplicon set  
254 based on the following, in relative order of importance: roughly two-thirds of the amplicons  
255 being from the *Bactrocera*-only run and having no degenerate bases, product length (to  
256 maximize sequencing efficiency), PI, the presence of degenerate bases in the all-species primers,  
257 and the number of species from which orthologs were predicted. This was a relatively subjective  
258 process, and the first two criteria played the largest part in amplicon selection. PI cannot be  
259 compared between the all-species and *Bactrocera*-only runs, as a larger reference tree will  
260 automatically increase PI. We also only selected one exon per ortholog, as orthologs would  
261 generally be inherited as a single unit and share similar evolutionary history (however, multiple  
262 exons per ortholog could be targeted if longer loci were desired). Only when multiple exons (or  
263 the same exon from the two independent locus selection runs) had similar product length and

264 relatively similar PI, did we consider the other criteria for amplicon selection. In other words, we  
265 only compared amplicon length, PI, the presence of degenerate bases, and the number of species  
266 (for which orthologs were predicted) when a single ortholog contained multiple potential  
267 amplicons; in this case we would compare these other attributes and select, for example, the  
268 longer amplicon or the one with the higher PI, subjectively. By avoiding tiling in locus design,  
269 and using a single amplicon per exon per ortholog, we aimed to maximize the unique loci  
270 sampled across the genome from a single amplicon pool, rather than maximizing locus length  
271 and sampling fewer unique loci. Tiling would also require subpooling of multiplex reactions, to  
272 avoid unintended amplicon products between primers in close proximity to each other. Primers  
273 were synthesized by a commercial vendor (Integrated DNA Technologies, IDT) and provided  
274 pooled in a single tube at a concentration of 250 nM.

275

## 276 Specimen Collection and DNA Extraction

277 Specimens were collected as part of a larger effort to sample the diversity of fruit flies in  
278 the subfamily Dacinae. Adults were collected using male lure (cue-lure or methyl eugenol) or  
279 protein lure (Torula yeast) baited traps, as described in Leblanc, *et al.* (2013), and stored in  
280 ~95% ethanol in the field before being frozen at -80°C in the lab. Larvae were collected in their  
281 host fruits and reared to the adult stage. A total of 384 specimens were selected, and detailed  
282 collection information is provided in Table S2; most sampled flies belonged to *Bactrocera* and  
283 *Zeugodacus*, but we also included species of *Anastrepha*, *Ceratitis*, *Dacus*, *Neoceratitis*, and  
284 *Rhagoletis*. Whole flies were homogenized with 3.175 mm metal lysing beads, at a speed of 4.0  
285 m/s for 20 seconds, in a FastPrep 24 homogenizer (MP Biomedical, Santa Ana, CA). The  
286 resulting homogenate was incubated at 55°C for three to twelve hours with proteinase K and

287 tissue lysis buffer following manufacturer's recommendations (Macherey-Nagel, Düren,  
288 Germany). We extracted DNA using a KingFisher Flex-96 automated extraction instrument  
289 (Thermo Scientific, Waltham, MA) and NucleoMag Tissue extraction kits (Macherey-Nagel,  
290 Düren, Germany), with an RNase A treatment, following manufacturer's recommendations.  
291 DNA was eluted into 100 uL of Mag-Bind elution buffer, and quantified on a Fragment Analyzer  
292 Automated Capillary Electrophoresis System using a high sensitivity genomic DNA analysis kit  
293 (Advanced Analytical Technology, Ankeny, IA). We normalized DNA to 10 ng/μL using a  
294 Gilson PIPETMAX 268 (Gilson, Middleton, WI), unless the initial concentration was <10  
295 ng/μL. The latter were left at their initial concentration. DNA quality was variable (Table S2)  
296 and some samples appeared to be of very poor quality or low concentration; we included some  
297 low-quality samples to test how the quality of input DNA impacts the resulting library.

298

### 299 Library Preparation and Sequencing

300 We generated amplicons for all specimens using highly multiplexed PCR with a  
301 CleanPlex Targeted Library Kit (Paragon Genomics, San Francisco, CA). This library  
302 preparation consists of only three main steps and can be completed in <1/2 day of bench time: 1)  
303 amplify DNA targets using multiplex PCR, 2) digest non-specific products, and 3) add and  
304 amplify indexes and Illumina compatible adapters using a second PCR. Each of these steps is  
305 followed by purification using magnetic beads; for all purification steps we used in-house  
306 paramagnetic beads (as described in Rohland and Reich 2012) and an Alpaqua 96S Magnet plate  
307 (Alpaqua Engineering, Beverly, MA), and used a ratio of 1:3 sample:beads. We followed  
308 manufacturer's recommendations for all library preparation steps. Briefly, for the first, locus-  
309 specific multiplex PCR, we used the 5X primer pool protocol, including 5 μL nuclease-free

310 water, 2  $\mu$ L 5X mPCR mix (Paragon Genomics), 2  $\mu$ L 5X primer pool, and 30 ng (1  $\mu$ L) of input  
311 DNA for samples that had an initial concentration  $>10$  ng/ $\mu$ L or 50-60 ng (2  $\mu$ L) for samples that  
312 had an initial concentration  $<10$  ng/ $\mu$ L. Locus-specific primers used in the multiplex PCR had  
313 common sequences appended to their 5' ends that matched the common sequence in the Illumina  
314 Nextera XT Index Kit v2 (i5 and i7, see below). Thermal cycling conditions consisted of a pre-  
315 heat step at 95°C for 10 minutes, 10 cycles of 98°C for 15 seconds followed by 60°C for 5  
316 minutes, and a final hold at 10°C. To digest non-specific products, we added 6  $\mu$ L of nuclease-  
317 free water and 2  $\mu$ L each of the CP Reagent Buffer and Digestion Reagent to the cleaned PCR  
318 product, incubated at 37°C for 10 minutes, and used 2  $\mu$ L stop buffer to terminate the reaction. In  
319 the second PCR, we added the Illumina Nextera XT Indexes (v2) by adding 18  $\mu$ L nuclease-free  
320 water, 8  $\mu$ L 5X 2<sup>nd</sup> PCR Mix (Paragon Genomics), and 2  $\mu$ L each of the i5 and i7 adapters (10  
321  $\mu$ M) to the cleaned, digested product. Using twenty-four i7 adapters and sixteen i5 adapters  
322 allowed individual indexing with 384 unique combinations. Thermal cycling conditions for this  
323 PCR were identical to the first PCR, except the 60°C portion of the cycle was held for 75  
324 seconds, and eight cycles were used. The number of cycles was determined using manufacturer  
325 recommendations given 878 targeted amplicons and the generally low quantity of DNA.

326 We assessed library quality for each individual using a Fragment Analyzer, and a dsDNA  
327 910 Kit (Advanced Analytical Technologies, Ankeny, IA), which is a qualitative kit that  
328 provides an accurate size distribution and a relative measure of sample concentration.  
329 Unfortunately, the Fragment Analyzer experienced mechanical difficulties during these runs and  
330 produced inconsistent results (see below), which were confirmed by quantifying several samples  
331 on a 2100 Bioanalyzer with the high sensitivity DNA Kit (Agilent, Santa Clara, CA). Given the  
332 low library volume at this stage ( $\sim 6$   $\mu$ L), we used the Fragment Analyzer results to qualitatively

333 bin samples into four categories: 1) “Good libraries” (good size distribution and relatively high  
334 DNA concentration), 2) “Moderate libraries” (good size distribution but lower DNA  
335 concentration), 3) “Poor libraries” (very low concentration, but size distribution still visible), and  
336 4) “Blank libraries” (virtually no library present). Example traces from these subpools are  
337 provided in Figure S1. The fourth category of libraries was the most inconsistent between the  
338 Fragment Analyzer and Bioanalyzer, and in some cases a virtually nonexistent library as  
339 measured on the Fragment Analyzer was resolved on the Bioanalyzer. We pooled individuals  
340 from each of these library quality categories, and quantified these subpools using the Bioanalyzer  
341 as above. We then normalized subpools at equal molar ratios (considering the number of  
342 individuals per subpool) and generated a final library that was purified using paramagnetic beads  
343 (brought to a volume of 25  $\mu$ L, using a ratio of 1:1 library:beads), and quantified using a Qubit  
344 2.0 fluorometer with the dsDNA HS Assay Kit (Thermo Scientific, Waltham, MA). Paired-end  
345 300 bp sequencing of the entire library was conducted on an Illumina MiSeq with sequencing  
346 reagent kit v3. Following preliminary analysis of this data, a second final normalized library was  
347 constructed from the moderate, poor, and blank libraries, and sequenced in the same fashion on a  
348 second run of the MiSeq sequencer; this second run was an effort to overcome the above errors  
349 in quantifying and normalizing the libraries.

350

## 351 Data Processing

352 All data processing steps (summarized in Fig. 2) and phylogenetic analyses used default  
353 parameters and settings unless otherwise noted. Demultiplexing and FASTQ file generation was  
354 conducted using BaseSpace’s FASTQ Generation Analysis v1.0.0 (Illumina, San Diego, CA).  
355 From raw FASTQ files, we concatenated paired-end read files from both sequencing runs,



356 removed Illumina adapters with cutadapt (Martin 2011), and used FLASH (Magoc and Salzberg  
357 2011) to merge paired-end reads. We then used cutadapt to demultiplex each individual FASTQ  
358 file by amplicon by specifying each primer pair with the `-a` option, and requiring an overlap of  
359 10 bp (`-o 10`). We then used part03 of the HiMAP pipeline to call a consensus sequence for  
360 each amplicon per individual. This script finds the most prevalent read length for each individual  
361 per amplicon and calls a degenerate consensus sequence based on all reads of that length, using  
362 the rules of Cavener (1987) via Bio.motifs in BioPython (Cock, *et al.* 2009). A minimum of five  
363 reads (per consensus) are required per individual per amplicon (this minimum read filter can be  
364 specified), and any consensus read that is <65 bp is removed (based on an observed natural break  
365 in the data). This script then calculates the mean length of the consensus sequences across all  
366 individuals per amplicon, and if an individual's consensus sequence length deviates >20 bp from  
367 the mean (also based on an observed natural break in the data), it is removed. The output of this  
368 script is a single multi-FASTA per amplicon with consensus sequences for each individual using  
369 IUPAC ambiguities to represent heterozygous bases. For reads that could not be FLASH-merged  
370 (as identified by FLASH), we used the forward reads only (read 1), and demultiplexed and called  
371 consensus sequences as above. We then used an in-house Python script to compare the FLASH-  
372 merged and non-FLASH-merged consensus sequences, which added non-FLASH-merged  
373 sequences to the multi-FASTA files if those amplicon/individual combinations were not present  
374 in the FLASH-merged data. Finally, we incorporated the sequences from the data sources used  
375 for the locus selection pipeline (13 species), bringing the total number of taxa to 397.

376       Because loci were sequenced end-to-end, demultiplexing by primer sequences leads to  
377 individual consensus sequences that are already more-or-less aligned. However, some variation  
378 in sequence length within each amplicon was observed, generally due to biologically-real

379 insertion/deletion events (3-9 bp differences). Therefore, we aligned all amplicons using the L-  
380 INS-I algorithm in MAFFT, before using `alignment_assessment_v1.py` (Portik, *et al.*  
381 2016) and Bash scripts to assess data coverage across individuals and amplicons. We identified  
382 amplicon alignments with high proportions of gaps (>1%, 45 amplicons) and variable sites  
383 (>40%, 70 amplicons), as we observed that these characteristics were associated with off-target  
384 (non-matching) sequences and residual primer sequence. We checked these alignments manually  
385 using AliView v1.18 (Larsson 2014), removed offending individuals (from 11 amplicons total),  
386 and re-aligned before recalculating data coverage as above. Finally, we addressed missingness in  
387 the dataset by removing individuals that had <100 amplicons (< ~11% coverage), and amplicons  
388 that had <200 individuals (< ~52% coverage).

389

## 390 Phylogenetic Analyses

391 We conducted two main types of phylogenetic analysis, general tree searches of  
392 concatenated datasets and species tree estimations, and used *Rhagoletis completa* Cresson 1929  
393 as an outgroup for all analyses based on Segura, *et al.* (2007), Krosch, *et al.* (2012), and  
394 preliminary analyses. First, we conducted maximum likelihood (ML) and Bayesian inference  
395 (BI) based tree searches of the concatenated nucleotide alignment using IQ-TREE v1.4.2  
396 (Nguyen, *et al.* 2015) and ExaBAYES v1.5 (Aberer, *et al.* 2014), respectively. IQ-TREE was run  
397 with 1,000 ultra-fast bootstrapping replicates (Minh, *et al.* 2013) and 1,000 replicates of the  
398 Shimodaira/Hasegawa approximate likelihood-ratio test (SH-aLRT: Guindon, *et al.* (2010)) to  
399 assess node support. The model of evolution was selected using IQ-TREE's model selection  
400 procedure. For BI using ExaBAYES, four independent runs were conducted, each having four  
401 coupled chains and attempting four swaps per generation on average. Each independent run

402 progressed for one million generations and was sampled every 1,000 generations. We assessed  
403 convergence and sampling of parameter values' posterior distributions with Tracer v1.6  
404 (Rambaut, *et al.* 2014), by ensuring that effective sample sizes were >200. We manually  
405 removed the first 25% of trees from each run as burn-in, combined post burn-in trees for all runs,  
406 and built a consensus tree using TreeAnnotator (Drummond, *et al.* 2012). Trees were visualized  
407 using FigTree v1.4.2 (Rambaut and Drummond 2010), GraPhlAn v0.9.7 (Asnicar, *et al.* 2015),  
408 and the APE library (Paradis, *et al.* 2004) in R v3.3.1 (R Core Team 2016).

409         We then tested two other main phylogenetic considerations using additional ML tree  
410 searches in IQ-TREE. First, we conducted partitioned analysis using a scheme estimated by  
411 PartitionFinder2 v2.1.1 (Lanfear, *et al.* 2017). We used the `rcluster` algorithm (with  
412 `rcluster-max = 1,000` and `rcluster-percent = 10`, as suggested in the documentation)  
413 on all models for all nucleotide partitions (739 in total) with the AICc selection criteria in  
414 PartitionFinder2, and allowed partition-specific rates in IQ-TREE. Second, to accommodate for  
415 nucleotide saturation, we conducted analyses on peptide sequence alignments generated from the  
416 raw nucleotide alignments. To generate peptide sequences, we created a BLAST database from  
417 the concatenated input of the ortholog prediction for locus selection (the longest representative  
418 transcript of each predicted protein), and used BLASTX in BLAST+ (Camacho, *et al.* 2009) to  
419 predict peptide sequences from the nucleotide alignments. We set `-max_target_seqs` to one  
420 to output a single returned hit per individual per gene, and reformatted these outputs to fasta  
421 format before aligning with MAFFT, as before. We then manually checked alignments with gaps  
422 and those where the number of individuals did not match the number of individuals in the  
423 nucleotide alignment, and removed alignments where the BLASTX search was returning non-  
424 orthologous hits. Finally, as with the nucleotide datasets, we removed amplicons with <200

425 individuals and individuals with <100 amplicons. We conducted tree searches on the peptide-  
426 based alignment using IQ-TREE's model selection procedure, as well as using a partitioning  
427 scheme estimated by PartitionFinder2, which was run in the same fashion as for the nucleotide  
428 alignment.

429         We estimated species trees from the nucleotide alignment using three methods:  
430 polymorphism-aware phylogenetic models (PoMo) (Schrempf, *et al.* 2016) in a ML framework,  
431 and coalescent-based frameworks with quartet inference in SVDquartets (Chifman and Kubatko  
432 2014) and ASTRAL-II (Mirarab and Warnow 2015). These three methods are well-suited for this  
433 type of dataset because they allow for missing data among specimens and species, are amenable  
434 to large datasets, and can take into account multiple individuals per species (a parameter we  
435 enforced for all three analyses). Polymorphism-aware phylogenetic models incorporate  
436 population site frequency data to directly account for incomplete lineage sorting within species,  
437 and we implemented PoMo in IQ-TREE's PoMo version v1.4.3 (Nguyen, *et al.* 2015). We used  
438 the `FastaToCounts.py` script in the `cflib` library (Schrempf, *et al.* 2016) to generate the  
439 allele counts input file, the general time-reversible (GTR) model with default PoMo additions,  
440 and 1,000 ultra-fast bootstrap replicates to assess node support. Quartet inference uses algebraic  
441 statistics to infer species relationships by considering the relationship among four species at a  
442 time (quartets), and summarizing quartets across the dataset (Chifman and Kubatko 2014).  
443 SVDquartets generates quartets from single-sites (single mutations) across a dataset, whereas  
444 ASTRAL-II takes individual gene trees as input and has been shown to outperform SVDquartets  
445 when incomplete lineage sorting is high (Chou, *et al.* 2015). We implemented SVDquartets in  
446 PAUP v4.a152 (Swofford 2017) and evaluated 10 million random quartets with *R. completa* set  
447 as the outgroup (preliminary analysis that evaluated all possible quartets produced virtually

448 identical topologies). We generated gene trees for ASTRAL-II using the best trees generated by  
449 RAxML v8.2.4 (Stamatakis 2014) for each amplicon (using the GTRGAMMA model), and  
450 implemented the multiple individual version of ASTRAL-II v4.10.12 (Mirarab and Warnow  
451 2015), using its default branch support measurement (Sayyari and Mirarab 2016). We  
452 quantitatively compared trees from both the main phylogenetic analyses and species tree  
453 analyses using normalized matching cluster distances (Bogdanowicz and Giaro 2013) in  
454 TreeCmp v1.1-b308 (Bogdanowicz, *et al.* 2012).

455

## 456 RESULTS

### 457 Locus Selection Pipeline

458         The 13 initial data sources for our locus selection pipeline consisted of six genomes and  
459 seven transcriptomes and had an average of 11,085 representative genes/unigenes per data source  
460 (Fig. 1). OrthoMCL predicted 14,365 orthologs, 6,181 of which were single-copy and present in  
461 at least eight species (including the four with “high quality annotations”). From these 6,181  
462 orthologs, the two runs of our locus selection pipeline (all-species and *Bactrocera*-only,  
463 respectively) generated 13,143 and 15,350 raw exons and 10,974 and 13,823 filtered exons (see  
464 Methods for distinction). Given the anticipated number of reads per specimen generated from a  
465 single lane of sequencing on the MiSeq and read-depth, we aimed for between 800 and 1,000  
466 amplicons (conservatively planning 20 million reads per run, 1000 amplicons, and 384  
467 specimens equates to ~50x coverage). Thus, from the filtered exons for which primers could be  
468 made, we selected 372 and 730 primer sets (all-species and *Bactrocera*-only, respectively) to  
469 filter by amplicon characteristic (length, PI, presence of degenerate bases, etc.), and chose 878

470 amplicons for the final amplicon set. Primers were an average of 21.5 bp in length (without  
471 adapters for Illumina sequencing), and 205 contained degenerate bases.

472

### 473 Sequencing and Data Processing

474 Two MiSeq runs produced 37.8 million reads (20.3 and 17.5, respectively) that were  
475 successfully demultiplexed by specimen, with an average of 98.6 thousand reads per individual.

476 A total of 37.1 million reads were successfully demultiplexed by amplicon, with 35.4 million of  
477 those being FLASH-joined reads (95.4%), and the remaining 1.7 million being “read 1 only”

478 reads (reads not successfully FLASH-joined, 4.6%). A total of 34.9 million reads were used to  
479 call consensus sequences across all individuals (average per individual: 99.4 thousand reads),

480 which resolved a total of 227,499 individual consensus sequences out of a possible 337,152 (384  
481 individuals x 878 loci). The average read depth per consensus sequence ( $N = 227,499$ ) was 153.8

482 ( $\pm 1.09$ ). Only 394,085 reads (1.04% of all reads) matched to an individual and an amplicon, but  
483 were not used to call a consensus (i.e. off-target sequences).

484 An average of 592 amplicons (67.4%) were resolved per individual (Table 1). Thirty-two  
485 individuals (8.3%) failed, with no recovered amplicons, and an additional 17 individuals (4.4%)

486 had poor performance with <100 recovered amplicons. An average of 259 individuals (67.4%)  
487 were resolved per amplicon, and <200 individuals were resolved in 139 amplicons (15.8%)

488 (Table S3). Individuals in higher quality library subpools had more amplicons resolved (Table

489 1). However, we also observed individuals from the “blank” subpool (the lowest quality) that had  
490 high proportions of amplicons resolved (Fig. 3); this indicates that our original library QC was

491 not accurate, but that this suboptimal QC did not bear directly on our end product (see Fig. S1).

492 There was a modest trend for shorter amplicons (Fig. 4a), but all amplicons had comparable

493 phylogenetic informativeness relative to amplicon length (Fig. 4b). Additionally, we observed no  
494 amplification bias based on whether the amplicon was selected from the all-species or  
495 *Bactrocera*-only locus selection pipeline, or whether degenerate bases were present in the  
496 primers (which were only allowed in primer design for the all-species amplicons) (Fig. 4a).  
497 Amplicon recovery was not related to initial DNA concentration (pre-library preparation:  $F_{1,382} =$   
498  $0.04051$ ,  $r^2 = -0.002$ ,  $p > 0.05$ ), however these concentrations would not address inflation due to  
499 bacterial DNA contamination (a phenomenon we have observed with other specimens collected  
500 in this manner) or overall DNA quality (specifically fragment size). Finally, amplicon recovery  
501 did generally decrease with increased phylogenetic distance from *Bactrocera*, regardless of  
502 library subpool (Fig. 5).

503

#### 504 Phylogenetic Analyses

505 Our final filtering to address missingness in the nucleotide alignments removed 49  
506 individuals and 138 amplicons, leading to a final dataset of 739 amplicons (151,511 bp  
507 concatenated alignment) for 348 individuals. Similar filtering for the peptide-based alignments  
508 resulted in 734 amplicons (49,528 peptides concatenated alignment) for 348 individuals.  
509 Phylogenetic analyses generally produced similar main topologies regardless of method. Figure 5  
510 shows a representative topology generated with ML of the peptide alignment, and all trees  
511 (including models and partitioning statistics) are provided in Figures S2-S6. All methods agreed  
512 on the main relationships between genera included here: *Anastrepha*, *Ceratitis*, *Neoceratitis*,  
513 *Dacus*, *Zeugodacus*, and *Bactrocera*. These relationships included a sister relationship between  
514 *Dacus* and *Zeugodacus*, which has received mixed support in previous studies (Virgilio, *et al.*  
515 2015). Most species were reciprocally monophyletic, except in the cases of known complexes

516 consisting of morphologically similar species (Fig. 5). A small number of individuals were  
517 placed in unexpected positions on the tree (noted in Fig. S2). In some cases, this appeared to be  
518 the result of potential specimen misidentifications or a mix-up during specimen or library  
519 preparation, for example one *Z. cucurbitae* and one *Z. tau* individual being placed in the other's  
520 respective clade. In other placements, it is less clear whether misidentifications or biological  
521 causes (cryptic species) are to blame, as in the case of *B. fuscitibia* being placed in disparate  
522 clades on most trees (e.g. Fig. S2). Node support was generally high across the tree regardless of  
523 method (SH-aLRT/ultra-fast bootstrap > 0.8/0.95 or posterior probability > 0.9), and  
524 qualitatively, terminal branch lengths were slightly longer in partitioned analysis and the peptide-  
525 based analysis.

526         The main discordance between methods was observed in relationships between groups of  
527 closely-related *Bactrocera* species. This discordance is most easily visualized when comparing  
528 the species tree estimations (Fig. 6), although similar discordance was observed when comparing  
529 consensus trees from ML and BI analyses as well as nucleotide and peptide alignments (Figs. S2-  
530 S6). Most sister species pairs and complexes were conserved across analyses (e.g. (*B. nigrifacia*,  
531 *B. nigrotibialis*) and (*B. unirufa*, (*B. wuzishana*, *B. amplexiseta*))), however, the mid-level  
532 relationships between these groups were more variable, and had lower node support in all  
533 analyses. Regardless, pair-wise normalized matching cluster distances between trees from both  
534 the main phylogenetic analyses (all specimens) and the species tree analyses indicated that  
535 overall these trees were quite similar to each other (Table S4). The potential species  
536 misidentifications mentioned above could impact species tree estimations, particularly when few  
537 specimens are sampled per species. However, the similar discordance between general tree  
538 searches (multiple specimens per species) and species tree methods suggest that the discordance



539 observed may be more likely a result of data characteristics (genes having different evolutionary  
540 histories) rather than potential misidentifications.

541

## 542 DISCUSSION

543 Here we demonstrate HiMAP, a new approach for building phylogenomic datasets using  
544 highly multiplexed amplicon sequencing. This methodology is relatively inexpensive and easily  
545 amenable to large numbers (hundreds) of taxa, requires minimal hands-on time at the bench, and  
546 data can be processed rapidly for consensus calls, avoiding read mapping or assembly. We  
547 discuss the advantages and disadvantages of HiMAP, our locus selection pipeline, and briefly,  
548 systematic conclusions from this dataset.

549

### 550 Phylogenomic Data Collection

551 Choice of phylogenomic data collection method often boils down to a few main logistical  
552 consideration and trade-offs (reviewed in Lemmon and Lemmon 2013), and the most commonly-  
553 used methods have clear strengths and limitations. HiMAP, combined with current advances in  
554 amplicon sequencing technology, provides an alternative strategy for cost-effective  
555 phylogenomic datasets of moderate to long length loci. Cost is a main consideration for any  
556 genomic study, and one of HiMAP's strengths is its relatively low cost, with a per-specimen cost  
557 of \$40-50 USD/specimen (list prices for this dataset provided in Table S5). This price is  
558 predominately dependent on three relatively expensive items, the library preparation kit, primers,  
559 and sequencing, but is roughly on-par with estimates for the per-specimen cost of sequencing  
560 UCEs (~\$65/specimen: Faircloth, BC, *personal communication*). Additional advantages of this  
561 approach are that amplicon library preparation is simple (it consists of two PCR reactions per

562 sample, a digestion step, and intermediate clean up steps) and fast (2.5 hours for a handful of  
563 specimens, a half day for 48-96 specimens at a time), equating to low personnel costs. Finally,  
564 this approach generates very efficient use of sequencing reads (92% of the raw reads were used  
565 to call consensus sequences). Taken together, these characteristics lead to high overall cost-  
566 effectiveness.

567         The challenges of multiplex PCR generally have revolved around issues of substantial  
568 validation and optimization of multiplex reactions, inconsistent and off-target amplification,  
569 limited utility as phylogenetic distance increases, and the prevalence of primer dimers  
570 (Markoulatos, *et al.* 2002, Lemmon and Lemmon 2013). Ultimately, given the advances in  
571 current amplicon sequencing technology, we experienced very few of these challenges. We  
572 conducted no validation or optimization of multiplex reactions other than filtering out exons that  
573 had primer compatibility issues, and had very few cases of off-target amplification (most of  
574 which were removed automatically in data filtering (see below); only 11 amplicon alignments  
575 were manually edited to remove off-target sequences). By allowing a single degenerate base per  
576 primer we aimed to broaden the phylogenetic utility of this amplicon set, and we were able to  
577 recover hundreds of loci in genera separated by 65-100 million years (*Bactrocera* vs. *Rhagoletis*  
578 or *Ceratitis*: Krosch, *et al.* (2012), Tephritidae: Caravas and Friedrich (2013)). The amplification  
579 procedure and proprietary digestion step of the CleanPlex Targeted Library Kit were effective in  
580 limiting and removing primer/adaptor dimers, respectively, as we observed no signs of dimers  
581 during final library preparation QC or in sequencing results (Fig. S1). Input DNA requirements  
582 are quite low (tens of nanograms), and we observed high amplification success in samples with  
583 low DNA quality. Additionally, although our library QC was less than ideal, we were able to  
584 achieve high amplicon recovery (>80%) from samples across a broad range of quality and

585 source, including those with low DNA quantity (Table S2). A simpler library QC process,  
586 involving library quantification rather than measuring the library size distribution, with spot  
587 checks of size distribution as we did here, may be more effective than methods used in this  
588 study. Although further research will be required to validate the minimum required DNA quality  
589 and quantity, our results are optimistic that this approach may work reasonably well with historic  
590 or museum specimens. The CleanPlex library technology was designed to be implemented with  
591 cancer tissue samples, or other biopsy tissue that may be preserved as formalin-fixed paraffin-  
592 embedded (FFPE) specimens; these DNA sources often have similar quality issues as historical  
593 museum samples (low quality and quality). Additionally, tiling of smaller amplicons (100-200  
594 bp) across a target region could facilitate use of this method with historical samples, and would  
595 provide a useful comparison with other phylogenomic approaches using museum specimens  
596 (Blaimer, *et al.* 2016b, McCormack, *et al.* 2016).

597 Finally, data processing from raw sequence data to consensus sequences, like the wet lab  
598 steps, is streamlined and fast. The primary reason for this is that locus recovery is ideally tailored  
599 to be end-to-end, so that data processing can be assembly-free (a maximum amplicon length of  
600 450 bp was used here to accommodate 2x300 bp sequencing). Our primary data processing  
601 approach consists only of two steps of demultiplexing with cutadapt (Martin 2011), merging  
602 paired-end reads with FLASH (Magoc and Salzberg 2011), DNA alignment with MAFFT (Katoh  
603 and Standley 2013), and filtering using a custom Python script (Fig. 2). This approach is  
604 analytically straightforward, and could theoretically be accomplished on a modern laptop in a  
605 reasonable amount of time; with the use of modest high-performance computing resources, all  
606 data processing steps for a dataset of the size presented here can be conducted in several hours.  
607 Additionally, the standard output format (aligned multi-FASTA format) is easily used directly, or

608 with simple reformatting, by many routine phylogenetic software packages. This consensus  
609 sequence approach streamlines the transition from data processing to phylogenetic analysis,  
610 although other more analytically intensive procedures (e.g. phasing, discussed below) might be  
611 favorable.

612 Overall, HiMAP provides a cost-effective strategy to generate moderate to long length  
613 phylogenomic loci for hundreds of individuals in a time-efficient manner. Compared to other  
614 phylogenomic data collection approaches, the overall alignment length of this dataset is similar  
615 to some of those generated with AHE or UCE approaches (e.g. Brandley, *et al.* 2015, Breinholt,  
616 *et al.* 2017), and the ability to efficiently sequence hundreds of specimens is advantageous.  
617 Including more species and more specimens per species is an important consideration, as adding  
618 additional taxa, even with high missing data, has been shown to increase phylogenetic accuracy  
619 (Wiens and Tiu 2012) and reduce nonphylogenetic signal caused by systematic error (Baurain, *et*  
620 *al.* 2007, Philippe and Roure 2011). Additionally, the ability to target specific loci for individual  
621 experiments in a cost-effective manner, rather than relying on a single locus- or probe-set  
622 generated for a broad taxonomic group, is an attractive characteristic. In this way, locus selection  
623 can be tailored for particular research questions and phylogenetic scales, and thus be more  
624 efficient in targeting highly informative loci for each study.

625

## 626 Locus Selection Pipeline & Data Processing

627 One limitation of this overall method is that it does require a set of previously selected  
628 loci from which to develop primers, although many other commonly-used approaches share this  
629 limitation (Lemmon and Lemmon 2013, Jones and Good 2016). To this end, we developed a  
630 bioinformatic locus selection pipeline that ingests virtually any genomic or transcriptomic

631 resource, and predicts conserved, orthologous exons that are also phylogenetically informative.  
632 One or more “high-quality” annotation(s) is required by this pipeline to predict exon boundaries  
633 across all data sources, but besides this high-quality annotation, data sources of any quality can  
634 be used. This provides a valuable use for relatively low quality data sources (preliminary genome  
635 sequencing or resequencing experiments, tissue-specific RNA-Seq experiments, etc.) that may be  
636 difficult to use for other genomic endeavors. With the steadily decreasing cost of high  
637 throughput sequencing, the availability of genomes and transcriptomes should continue to  
638 increase, thus providing valuable data for comparative applications such as ours here (see also  
639 Faircloth 2017).

640 In this study we targeted relatively short amplicons, compared to many probe-based  
641 approaches that often target longer genes through tiling of multiple probes across a gene  
642 (Faircloth, *et al.* 2013, Breinholt, *et al.* 2017). Our goal was to sample as many unlinked genomic  
643 regions as possible, rather than fewer, but longer, loci. We found no relationship between  
644 amplicon length and its relative phylogenetic informativeness (Fig. 4b), suggesting that the  
645 results of this approach are not biased by targeting shorter amplicons. While data processing is  
646 simplified by sequencing amplicons in an end-to-end fashion, it also places a limit on amplicon  
647 length that is absent in sequence capture approaches. However, if longer length amplicons were  
648 desired (e.g. to increase resolution of gene tree analyses), multiple exons per gene could be  
649 targeted as individual amplicons, and concatenated end-to-end data processing.

650 We envision several ways to increase the robustness of the data processing pipeline and  
651 analysis of HiMAP data. First, we are solely relying on the ortholog prediction process (and in  
652 turn the quality of the genomic/transcriptomic inputs to that process) and general data alignment  
653 and filtering to eliminate potential paralogs in our dataset. While we are confident in the overall

654 quality of most of these inputs, particularly the “high quality” ones used extensively in the locus  
655 selection pipeline, additional validation steps could be used to ensure that the final datasets  
656 consist only of single-copy orthologs (e.g. Kristensen, *et al.* 2011). Second, this data processing  
657 approach does not account for PCR duplicates. Unlike many next-generation sequencing  
658 libraries, there is no random shearing step which facilitates the identification of PCR duplicates.  
659 Here, the only post-hoc method of avoiding PCR duplicates would be to increase minimum read  
660 depth for consensus calling; however, given the very high average read depth, setting this  
661 threshold would be an arbitrary decision (preliminary analyses with a higher read depth resulted  
662 in similar phylogenetic conclusions). The use of a “molecular tag” or “unique molecular  
663 identifier”, which is short randomer appended to the sequencing primers (Kinde, *et al.* 2011,  
664 Yourstone, *et al.* 2014, Kou, *et al.* 2016), would facilitate identification and removal of PCR  
665 duplicates. We recommend such an approach for future HiMAP studies, to quantitatively  
666 evaluate the effect of PCR duplicates, and investigate appropriate minimum read-depth for this  
667 type of data. Finally, by calling a consensus sequence for heterozygote base calls, rather than  
668 phasing the diploid sequence data into haplotypes, we are potentially losing valuable  
669 phylogenetic information (Browning and Browning 2011). Although beyond the scope of this  
670 study, implementing haplotype phasing into the HiMAP pipeline, or downstream analyses,  
671 would be of great interest.

672

### 673 Systematic Conclusions

674 To date, molecular phylogenetic studies of Tephritidae have been limited to traditional  
675 molecular systematic approaches (<10 genes); the concatenated nucleotide alignment generated  
676 here is >50 fold larger than the most recent comparable dataset (Virgilio, *et al.* 2015). Although

677 the current study also sequenced more specimens than previous studies, we focused on  
678 sequencing multiple specimens per species and thus sampled fewer species overall (Krosch, *et*  
679 *al.* 2012, Virgilio, *et al.* 2015). For this reason, we limit our systematic conclusions to those  
680 dealing with generic relationships and morphologically-difficult species complexes for which we  
681 had intensive sampling.

682 All phylogenetic analyses agreed on a single set of relationships between genera within  
683 the subtribe Dacina (*Bactrocera*, *Dacus*, and *Zeugodacus*), and notably supported a sister  
684 relationship between *Dacus* and *Zeugodacus*. Virgilio, *et al.* (2015) recently elevated  
685 *Zeugodacus*, formerly a subgenus of *Bactrocera* (*Zeugodacus*), to the generic rank with data  
686 from four mitochondrial genes and a single nuclear gene. Although the authors suspected a sister  
687 relationship between *Dacus* and *Zeugodacus*, which would support earlier conclusions of  
688 Krosch, *et al.* (2012) again based on a handful of mitochondrial and nuclear genes, the exact  
689 relationships between genera within Dacina were unclear. Our dataset strongly supports this  
690 relationship, as well as the generic status of *Zeugodacus*.

691 We focused a large portion of our sampling on morphologically-challenging species  
692 complexes within *Bactrocera* and *Zeugodacus* (Fig. 5). Some of these complexes have received  
693 substantial taxonomic and systematic attention, such as the *B. dorsalis* complex, where the  
694 synonymization of several species (Schutze, *et al.* 2015) has been argued (Drew and Romig  
695 2016, Schutze, *et al.* 2017). Here, we asked whether our methods could distinguish between  
696 members of these complexes or not (i.e. reciprocal monophyly vs. para-/polyphyly). In some  
697 cases, we did find reciprocally monophyletic relationships between members of the complex (*Z.*  
698 *tau* & *Z. synnephes* and the *B. nigrotibialis* complex), but in most we were unable to fully  
699 separate members of the complex (the *Z. scutellaris*, *B. tryoni*, and *B. frauenfeldi* complexes)

700 (Fig. 5). The *B. dorsalis* complex consists of a large number of morphologically and ecologically  
701 similar species, including several that have been synonymized with *B. dorsalis* (Drew and Romig  
702 2013, Schutze, *et al.* 2015). We found support for the recent synonymization by Schutze, *et al.*  
703 (2015) (for clarity when referencing this synonymization, we use the pre-synonymization names  
704 in all supplementary trees), but otherwise find that most members of this complex are distinct  
705 and phylogenetically disparate from *B. dorsalis* *sec.* Leblanc, *et al.* (2015) and Schutze, *et al.*  
706 (2015). It is clear from this phylogenomic dataset that more detailed sampling and treatment of  
707 these complexes, on an individual basis, will be required to elucidate their evolutionary histories  
708 and potentially reevaluate their taxonomy. Additionally, more thorough sampling of species  
709 across the subtribe Dacina will be needed to evaluate general phylogenetic relationships within  
710 *Bactrocera*, *Dacus*, and *Zeugodacus*. The genome-wide markers developed here were selected  
711 based on their phylogenetic informativeness, and they should serve as a springboard for future  
712 genomics research in the Tephritidae.

713

## 714 Conclusions and Prospectives

715 Here we present HiMAP, a novel approach for generating phylogenomic datasets using  
716 highly multiplexed amplicon sequencing. Both the wet lab and data processing components are  
717 rapid and straightforward, and the overall approach generates inexpensive datasets of hundreds  
718 to thousands of genes for several hundred individuals. Given its unique strengths compared to  
719 other phylogenomic data collection methods, we hope this study serves as a foundation to further  
720 develop this approach. We envision several main ways to increase overall efficiency and cost-  
721 effectiveness. First, multiplexing could potentially be increased substantially, as the CleanPlex  
722 Targeted Library technology has been used to multiplex up to 20,000 reactions in a single tube.



723 However, as the number of targets increase, the cost of oligonucleotide synthesis also increases  
724 linearly, which may decrease the overall cost-effectiveness. Despite the linear cost increase, the  
725 oligonucleotides themselves are simple, unmodified oligos with no costly base modifications  
726 needed or additional purification, so could be generated through different methods. Alternative  
727 methods for oligonucleotide synthesis (e.g. array-based synthesis) may provide a more cost-  
728 effective way to increase multiplexing potential, however accounting for low yields using these  
729 approaches may prove to be a challenge. Additionally, multiplexed amplicon PCR technologies  
730 are rapidly improving and multiple providers are now creating such library kits; aspects of the  
731 HiMAP concept could be applied to various multiplex library preparation technologies (e.g. the  
732 Illumina TruSeq Custom Amplicon approach using extension ligation) or even alternative  
733 sequencing platforms (e.g. Thermo Fisher Ion AmpliSeq Panels using an Ion Torrent platform).  
734 Second, we could work to maximize the multiplexing of individuals in a run. We likely far  
735 exceeded required depth for many of our samples, with mean amplicon coverage of >100x,  
736 suggesting more individuals could have been indexed per library in this sequencing run.  
737 Optimizing the evenness of sample loading (through more accurate library QC, or working with  
738 standardized DNA input rather than variably low quality samples) would provide even greater  
739 potential for maximizing the multiplexing of a sequencing run, and increase overall efficiency.

740 Third, the MiSeq sequencing used here is on the low end of the sequencing output  
741 spectrum; targeting slightly shorter loci (200-300 bp) and sequencing on a HiSeq platform would  
742 greatly increase overall sequencing depth. Increasing sequencing output would additionally  
743 facilitate the pooling of more individuals and loci into a sequencing run. Extending the approach  
744 in such a way will require careful calculation of the balance between the number of targets, the  
745 number of individuals, anticipated sequencing depth, desired locus length, and cost. Considering

746 the maximum output per platform, a single lane of sequencing on a HiSeq4000 produces 25x  
747 more data than a single run on a MiSeq, thus translating to the potential to sequence, for  
748 example, 5,000 amplicons for 1,024 individuals with >100x coverage (and accommodating for  
749 lower sequencing output). Sequencing on a HiSeq platform would also facilitate comparison  
750 with other methods (AHE, UCE, etc.), as these methods most often use the HiSeq platform.  
751 Finally, we focused on a relatively conservative phylogenetic scale here, and it will be important  
752 to test this method's limits with regard to phylogenetic divergence. This will be relatively  
753 specific to each primer set, but general trends may emerge with in-depth exploration. Ultimately,  
754 we hope this study provides a starting point to further develop HiMAP, and continue to explore  
755 global biodiversity through the lens of genomics.

756

#### 757 ACKNOWLEDGEMENTS

758 We thank Ivy Wan and Shaobin Hou for assistance with sequencing that was conducted at the  
759 Advanced Studies in Genomics, Proteomics and Bioinformatics core facility at the University of  
760 Hawai'i at Mānoa, Boyd Mori for statistical assistance, Nicole Yoneishi and Jaymie Masuda for  
761 lab work, and Edward Braun and Brant Faircloth for their insightful comments on this  
762 manuscript. We thank Bishnu Bhandari, Kemo Badji, J. Caballero, Salley Cowen, Elaida  
763 Fiegalan, M. Aftab Hossain, Chia-Lung Huang, H.Y. Huang, David Haymer, Will Haines, Y.F.  
764 Hsu, Akito Kawahara, Sada Lal, Yuchi Lin, R. Messing, Aiko Ota, Sylvain Ouedrago, Rudolph  
765 Putoa, N. Pierce, J. Quintana, Eric Rodriguez, T. Stark, Ema Tora Vueti, Misael Valladares, L.H.  
766 Want, James Walker, Koon Hui Wang, Tianlin Xian, and APHIS technicians for collecting  
767 specimens. Funding for this project was provided by United States Department of Agriculture  
768 (USDA) Animal and Plant Health Inspection Service (APHIS) Farm Bill Section 10007 projects

769 “Diagnostic Resources to Support Fruit Fly Exclusion and Eradication, 2012-2014” and  
770 “Genomic approaches to fruit fly exclusion and pathway analysis, 2015-2016” to USDA-APHIS,  
771 USDA-ARS and UH Manoa (projects 3.0251.02 and 3.01251.03 (FY 2014), 3.0256.01 and  
772 3.0256.02 (FY 2015), and 3.0392.02 and 3.0392.03 (FY 2016)). Bioinformatic tools and source  
773 code available at <https://github.com/popphylo/HiMAP>, and raw sequencing data files are  
774 available at NCBI BioProject PRJNA398162 and SRA SRR5976662-SRR5977045; a stable  
775 release of all bioinformatic tools will be available from the Dryad Digital Repository. Figures  
776 were created using R (R Core Team 2016), Inkscape v0.91 (The Inkscape Team 2017), and  
777 GraPhlAn v0.9.7 (Asnicar, *et al.* 2015). USDA is an equal opportunity employer. Mention of  
778 trade names or commercial products in this publication is solely for the purpose of providing  
779 specific information and does not imply recommendation or endorsement by the U.S.  
780 Department of Agriculture.  
781

782 REFERENCES

- 783 Aberer AJ, Kobert K, Stamatakis A. 2014. ExaBayes: massively parallel bayesian tree inference  
784 for the whole-genome era. *Mol Biol Evol*, 31:2553-2556.
- 785 Asnicar F, Weingart G, Tickle TL, Huttenhower C, Segata N. 2015. Compact graphical  
786 representation of phylogenetic data and metadata with GraPhlAn. *PeerJ*, 3:e1029.
- 787 Barrow LN, Ralicki HF, Emme SA, Lemmon EM. 2014. Species tree estimation of North  
788 American chorus frogs (Hylidae: *Pseudacris*) with parallel tagged amplicon sequencing. *Mol*  
789 *Phylogenet Evol*, 75:78-90.
- 790 Baurain D, Brinkmann H, Philippe H. 2007. Lack of resolution in the animal phylogeny: closely  
791 spaced cladogeneses or undetected systematic errors? *Mol Biol Evol*, 24:6-9.
- 792 Blaimer BB, Brady SG, Schultz TR, Lloyd MW, Fisher BL, Ward PS. 2015. Phylogenomic  
793 methods outperform traditional multi-locus approaches in resolving deep evolutionary history: a  
794 case study of formicine ants. *BMC Evol Biol*, 15:271.
- 795 Blaimer BB, LaPolla JS, Branstetter MG, Lloyd MW, Brady SG. 2016a. Phylogenomics,  
796 biogeography and diversification of obligate mealybug-tending ants in the genus *Acropyga*. *Mol*  
797 *Phylogenet Evol*, 102:20-29.
- 798 Blaimer BB, Lloyd MW, Guillory WX, Brady SG. 2016b. Sequence Capture and Phylogenetic  
799 Utility of Genomic Ultraconserved Elements Obtained from Pinned Insect Specimens. *PLoS*  
800 *One*, 11:e0161531.
- 801 Bogdanowicz D, Giaro K. 2013. On a matching distance between rooted phylogenetic trees.  
802 *International Journal of Applied Mathematics and Computer Science*, 23.
- 803 Bogdanowicz D, Giaro K, Wrobel B. 2012. TreeCmp: Comparison of Trees in Polynomial Time.  
804 *Evolutionary Bioinformatics*:475.
- 805 Brandley MC, Bragg JG, Singhal S, Chapple DG, Jennings CK, Lemmon AR, Lemmon EM,  
806 Thompson MB, Moritz C. 2015. Evaluating the performance of anchored hybrid enrichment at  
807 the tips of the tree of life: a phylogenetic analysis of Australian *Eugongylus* group scincid  
808 lizards. *BMC Evol Biol*, 15:62.
- 809 Branstetter MG, Danforth BN, Pitts JP, Faircloth BC, Ward PS, Buffington ML, Gates MW,  
810 Kula RR, Brady SG. 2017a. Phylogenomic Insights into the Evolution of Stinging Wasps and the  
811 Origins of Ants and Bees. *Curr Biol*, 27:1019-1025.
- 812 Branstetter MG, Jesovnik A, Sosa-Calvo J, Lloyd MW, Faircloth BC, Brady SG, Schultz TR.  
813 2017b. Dry habitats were crucibles of domestication in the evolution of agriculture in ants. *Proc*  
814 *Biol Sci*, 284.
- 815 Breinholt JW, Earl C, Lemmon AR, Lemmon EM, Xiao L, Kawahara AY. 2017. Resolving  
816 relationships among the megadiverse butterflies and moths with a novel pipeline for Anchored  
817 Phylogenomics. *Systematic Biology*, doi: 10.1093/sysbio/syx048.
- 818 Browning SR, Browning BL. 2011. Haplotype phasing: existing methods and new  
819 developments. *Nat Rev Genet*, 12:703-714.
- 820 Calla B, Hall B, Hou S, Geib SM. 2014. A genomic perspective to assessing quality of mass-  
821 reared SIT flies used in Mediterranean fruit fly (*Ceratitis capitata*) eradication in California.  
822 *BMC Genomics*, 15:98.
- 823 Camacho C, Coulouris G, Avagyan V, Ma N, Papadopoulos J, Bealer K, Madden TL. 2009.  
824 BLAST+: architecture and applications. *BMC Bioinformatics*, 10:421.
- 825 Caravas J, Friedrich M. 2013. Shaking the Diptera tree of life: performance analysis of nuclear  
826 and mitochondrial sequence data partitions. *Systematic Entomology*, 38:93-103.

- 827 Cavener DR. 1987. Comparison of the consensus sequence flanking translational start sites in  
828 *Drosophila* and vertebrates. *Nucleic Acids Research*, 15:1353-1361.
- 829 Chamberlain JS, Gibbs RA, Ranier JE, Nguyen PN, Caskey CT. 1988. Deletion screening of the  
830 Duchenne muscular dystrophy locus via multiplex DNA amplification. *Nucleic Acids Res*,  
831 16:11141-11156.
- 832 Chen F, Mackey AJ, Stoeckert CJ, Jr., Roos DS. 2006. OrthoMCL-DB: querying a  
833 comprehensive multi-species collection of ortholog groups. *Nucleic Acids Res*, 34:D363-368.
- 834 Chen F, Mackey AJ, Vermunt JK, Roos DS. 2007. Assessing performance of orthology detection  
835 strategies applied to eukaryotic genomes. *PLoS One*, 2:e383.
- 836 Chifman J, Kubatko L. 2014. Quartet inference from SNP data under the coalescent model.  
837 *Bioinformatics*, 30:3317-3324.
- 838 Chou J, Gupta A, Yaduvanshi S, Davidson R, Nute M, Mirarab S, Warnow T. 2015. A  
839 comparative study of SVDquartets and other coalescent-based species tree estimation methods.  
840 *BMC Genomics*, 16:S2.
- 841 Cock PJ, Antao T, Chang JT, Chapman BA, Cox CJ, Dalke A, Friedberg I, Hamelryck T, Kauff  
842 F, Wilczynski B, de Hoon MJ. 2009. Biopython: freely available Python tools for computational  
843 molecular biology and bioinformatics. *Bioinformatics*, 25:1422-1423.
- 844 DaCosta JM, Sorenson MD. 2016. ddRAD-seq phylogenetics based on nucleotide, indel, and  
845 presence-absence polymorphisms: Analyses of two avian genera with contrasting histories. *Mol*  
846 *Phylogenet Evol*, 94:122-135.
- 847 Dale R. 2013. gffutils. <https://daler.github.io/gffutils/>.
- 848 Doumith M, Day MJ, Hope R, Wain J, Woodford N. 2012. Improved multiplex PCR strategy for  
849 rapid assignment of the four major *Escherichia coli* phylogenetic groups. *J Clin Microbiol*,  
850 50:3108-3110.
- 851 Drew RAI, Romig MC. 2013. Tropical Fruit Flies of South-East Asia (Tephritidae: Dacinae).  
852 Wallingford, CABI.
- 853 Drew RAI, Romig MC. 2016. Keys to the Tropical Fruit Flies of South-East Asia. Wallingford,  
854 CABI.
- 855 Drummond AJ, Suchard MA, Xie D, Rambaut A. 2012. Bayesian phylogenetics with BEAUti  
856 and the BEAST 1.7. *Mol Biol Evol*, 29:1969-1973.
- 857 Dupuis JR, Brunet BM, Bird HM, Lumley LM, Fagua G, Boyle B, Levesque R, Cusson M,  
858 Powell JA, Sperling FA. 2017. Genome-wide SNPs resolve phylogenetic relationships in the  
859 North American spruce budworm (*Choristoneura fumiferana*) species complex. *Mol Phylogenet*  
860 *Evol*, 111:158-168.
- 861 Edwards MC, Gibbs RA. 1994. Multiplex PCR: advantages, development, and applications.  
862 *Genome Res*, 3:S65-75.
- 863 Faircloth BC. 2017. Identifying conserved genomic elements and designing universal bait sets to  
864 enrich them. *Methods in Ecology and Evolution*, 8:1103-1112.
- 865 Faircloth BC, Branstetter MG, White ND, Brady SG. 2015. Target enrichment of ultraconserved  
866 elements from arthropods provides a genomic perspective on relationships among Hymenoptera.  
867 *Mol Ecol Resour*, 15:489-501.
- 868 Faircloth BC, Chang J, Alfaro ME. 2012a. TAPIR enables high-throughput estimation and  
869 comparison of phylogenetic informativeness using locus-specific substitution models. *asXiv*.
- 870 Faircloth BC, McCormack JE, Crawford NG, Harvey MG, Brumfield RT, Glenn TC. 2012b.  
871 Ultraconserved elements anchor thousands of genetic markers spanning multiple evolutionary  
872 timescales. *Syst Biol*, 61:717-726.

- 873 Faircloth BC, Sorenson L, Santini F, Alfaro ME. 2013. A Phylogenomic Perspective on the  
874 Radiation of Ray-Finned Fishes Based upon Targeted Sequencing of Ultraconserved Elements  
875 (UCEs). *PLoS One*, 8:e65923.
- 876 Fan JB, Chee MS, Gunderson KL. 2006. Highly parallel genomic assays. *Nat Rev Genet*, 7:632-  
877 644.
- 878 Geib SM, Calla B, Hall B, Hou S, Manoukis NC. 2014. Characterizing the developmental  
879 transcriptome of the oriental fruit fly, *Bactrocera dorsalis* (Diptera: Tephritidae) through  
880 comparative genomic analysis with *Drosophila melanogaster* utilizing modENCODE datasets.  
881 *BMC Genomics*, 15:942.
- 882 Gostel MR, Coy KA, Weeks A. 2015. Microfluidic PCR-based target enrichment: A case study  
883 in two rapid radiations of *Commiphora* (Burseraceae) from Madagascar. *Journal of Systematics  
884 and Evolution*, 53:411-431.
- 885 Grabherr MG, Haas BJ, Yassour M, Levin JZ, Thompson DA, Amit I, Adiconis X, Fan L,  
886 Raychowdhury R, Zeng Q, Chen Z, Mauceli E, Hacohen N, Gnirke A, Rhind N, di Palma F,  
887 Birren BW, Nusbaum C, Lindblad-Toh K, Friedman N, Regev A. 2011. Full-length  
888 transcriptome assembly from RNA-Seq data without a reference genome. *Nat Biotechnol*,  
889 29:644-652.
- 890 Guindon S, Dufayard JF, Lefort V, Anisimova M, Hordijk W, Gascuel O. 2010. New algorithms  
891 and methods to estimate maximum-likelihood phylogenies: assessing the performance of PhyML  
892 3.0. *Syst Biol*, 59:307-321.
- 893 Hahn C, Fromm B, Bachmann L. 2014. Comparative genomics of flatworms (Platyhelminthes)  
894 reveals shared genomic features of ecto- and endoparasitic neodermata. *Genome Biol Evol*,  
895 6:1105-1117.
- 896 Hamilton CA, Lemmon AR, Lemmon EM, Bond JE. 2016. Expanding anchored hybrid  
897 enrichment to resolve both deep and shallow relationships within the spider tree of life. *BMC  
898 Evol Biol*, 16:212.
- 899 Hedin M, Starrett J, Akhter S, Schonhofer AL, Shultz JW. 2012. Phylogenomic resolution of  
900 paleozoic divergences in harvestmen (Arachnida, Opiliones) via analysis of next-generation  
901 transcriptome data. *PLoS One*, 7:e42888.
- 902 Hedtke SM, Morgan MJ, Cannatella DC, Hillis DM. 2013. Targeted enrichment: maximizing  
903 orthologous gene comparisons across deep evolutionary time. *PLoS One*, 8:e67908.
- 904 Hendrichs J, Vera MT, De Meyer M, Clarke AR. 2015. Resolving cryptic species complexes of  
905 major tephritid pests. *Zookeys*:5-39.
- 906 Hosner PA, Faircloth BC, Glenn TC, Braun EL, Kimball RT. 2016. Avoiding Missing Data  
907 Biases in Phylogenomic Inference: An Empirical Study in the Landfowl (Aves: Galliformes).  
908 *Mol Biol Evol*, 33:1110-1125.
- 909 Johnson BR, Borowiec ML, Chiu JC, Lee EK, Atallah J, Ward PS. 2013. Phylogenomics  
910 resolves evolutionary relationships among ants, bees, and wasps. *Curr Biol*, 23:2058-2062.
- 911 Jones E, Oliphant E, Peterson P, et al. 2001. SciPy: open source scientific tools for Python.  
912 <http://www.scipy.org/>.
- 913 Jones MR, Good JM. 2016. Targeted capture in evolutionary and ecological genomics. *Mol Ecol*,  
914 25:185-202.
- 915 Katoh K, Standley DM. 2013. MAFFT multiple sequence alignment software version 7:  
916 improvements in performance and usability. *Mol Biol Evol*, 30:772-780.
- 917 Kawahara AY, Breinholt JW. 2014. Phylogenomics provides strong evidence for relationships of  
918 butterflies and moths. *Proc Biol Sci*, 281:20140970.

- 919 Keilwagen J, Wenk M, Erickson JL, Schattat MH, Grau J, Hartung F. 2016. Using intron  
920 position conservation for homology-based gene prediction. *Nucleic Acids Res*, 44:e89.
- 921 Kinde I, Wu J, Papadopoulos N, Kinzler KW, Vogelstein B. 2011. Detection and quantification  
922 of rare mutations with massively parallel sequencing. *Proceedings of the National Academy of*  
923 *Sciences*, 108:9530-9535.
- 924 Kou R, Lam H, Duan H, Ye L, Jongkam N, Chen W, Zhang S, Li S. 2016. Benefits and  
925 Challenges with Applying Unique Molecular Identifiers in Next Generation Sequencing to  
926 Detect Low Frequency Mutations. *PLoS One*, 11:e0146638.
- 927 Kristensen DM, Wolf YI, Mushegian AR, Koonin EV. 2011. Computational methods for Gene  
928 Orthology inference. *Brief Bioinform*, 12:379-391.
- 929 Krosch MN, Schutze MK, Armstrong KF, Graham GC, Yeates DK, Clarke AR. 2012. A  
930 molecular phylogeny for the Tribe Dacini (Diptera: Tephritidae): systematic and biogeographic  
931 implications. *Mol Phylogenet Evol*, 64:513-523.
- 932 Kumar S, Filipski AJ, Battistuzzi FU, Kosakovsky Pond SL, Tamura K. 2012. Statistics and truth  
933 in phylogenomics. *Mol Biol Evol*, 29:457-472.
- 934 Lanfear R, Frandsen PB, Wright AM, Senfeld T, Calcott B. 2017. PartitionFinder 2: New  
935 Methods for Selecting Partitioned Models of Evolution for Molecular and Morphological  
936 Phylogenetic Analyses. *Mol Biol Evol*, 34:772-773.
- 937 Larsson A. 2014. AliView: a fast and lightweight alignment viewer and editor for large datasets.  
938 *Bioinformatics*, 30:3276-3278.
- 939 Leache AD, Chavez AS, Jones LN, Grummer JA, Gottscho AD, Linkem CW. 2015.  
940 Phylogenomics of phrynosomatid lizards: conflicting signals from sequence capture versus  
941 restriction site associated DNA sequencing. *Genome Biol Evol*, 7:706-719.
- 942 Leblanc L, Hossain MA, Khan SA, Jose MS, Rubinoff D. 2013. A Preliminary Survey of the  
943 Fruit Flies (Diptera: Tephritidae: Dacinae) of Bangladesh. *Proceedings of the Hawaiian*  
944 *Entomological Society*, 45:51-58.
- 945 Leblanc L, San Jose M, Barr N, Rubinoff D. 2015. A phylogenetic assessment of the  
946 polyphyletic nature and intraspecific color polymorphism in the *Bactrocera dorsalis* complex  
947 (Diptera, Tephritidae). *Zookeys*:339-367.
- 948 Lemmon AR, Emme SA, Lemmon EM. 2012. Anchored hybrid enrichment for massively high-  
949 throughput phylogenomics. *Syst Biol*, 61:727-744.
- 950 Lemmon EM, Lemmon AR. 2013. High-Throughput Genomic Data in Systematics and  
951 Phylogenetics. *Annual Review of Ecology, Evolution, and Systematics*, 44:99-121.
- 952 Li L, Stoeckert CJ, Jr., Roos DS. 2003. OrthoMCL: identification of ortholog groups for  
953 Eukaryotic genomes. *Genome Res*, 13:2178-2189.
- 954 Magoc T, Salzberg SL. 2011. FLASH: fast length adjustment of short reads to improve genome  
955 assemblies. *Bioinformatics*, 27:2957-2963.
- 956 Markoulatos P, Siafakas N, Moncany M. 2002. Multiplex polymerase chain reaction: a practical  
957 approach. *J Clin Lab Anal*, 16:47-51.
- 958 Martin M. 2011. Cutadapt removes adapter sequences from high-throughput sequencing reads.  
959 *EMBnet. J.*, 17:10-12.
- 960 McCormack JE, Faircloth BC, Crawford NG, Gowaty PA, Brumfield RT, Glenn TC. 2012.  
961 Ultraconserved elements are novel phylogenomic markers that resolve placental mammal  
962 phylogeny when combined with species-tree analysis. *Genome Res*, 22:746-754.
- 963 McCormack JE, Hird SM, Zellmer AJ, Carstens BC, Brumfield RT. 2013. Applications of next-  
964 generation sequencing to phylogeography and phylogenetics. *Mol Phylogenet Evol*, 66:526-538.

- 965 McCormack JE, Tsai WL, Faircloth BC. 2016. Sequence capture of ultraconserved elements  
966 from bird museum specimens. *Mol Ecol Resour*, 16:1189-1203.
- 967 McKinney W. 2010. Data Structures for Statistical Computing in Python. Proceedings of the 9th  
968 Python in Science Conference:51-56.
- 969 Minh BQ, Nguyen MA, von Haeseler A. 2013. Ultrafast approximation for phylogenetic  
970 bootstrap. *Mol Biol Evol*, 30:1188-1195.
- 971 Mirarab S, Warnow T. 2015. ASTRAL-II: coalescent-based species tree estimation with many  
972 hundreds of taxa and thousands of genes. *Bioinformatics*, 31:i44-52.
- 973 Moyle RG, Oliveros CH, Andersen MJ, Hosner PA, Benz BW, Manthey JD, Travers SL, Brown  
974 RM, Faircloth BC. 2016. Tectonic collision and uplift of Wallacea triggered the global songbird  
975 radiation. *Nat Commun*, 7:12709.
- 976 Nguyen LT, Schmidt HA, von Haeseler A, Minh BQ. 2015. IQ-TREE: a fast and effective  
977 stochastic algorithm for estimating maximum-likelihood phylogenies. *Mol Biol Evol*, 32:268-  
978 274.
- 979 Nylander JAA. 2016. *catfasta2phym*. GitHub repository,  
980 <https://github.com/nylander/catfasta2phym>.
- 981 O'Neill EM, Schwartz R, Bullock CT, Williams JS, Shaffer HB, Aguilar-Miguel X, Parra-Olea  
982 G, Weisrock DW. 2013. Parallel tagged amplicon sequencing reveals major lineages and  
983 phylogenetic structure in the North American tiger salamander (*Ambystoma tigrinum*) species  
984 complex. *Mol Ecol*, 22:111-129.
- 985 Papanicolaou A, Schetelig MF, Arensburger P, Atkinson PW, Benoit JB, Bourtzis K, Castanera  
986 P, Cavanaugh JP, Chao H, Childers C, Curril I, Dinh H, Doddapaneni H, Dolan A, Dugan S,  
987 Friedrich M, Gasperi G, Geib S, Georgakilas G, Gibbs RA, Giers SD, Gomulski LM, Gonzalez-  
988 Guzman M, Guillem-Amat A, Han Y, Hatzigeorgiou AG, Hernandez-Crespo P, Hughes DS,  
989 Jones JW, Karagkouni D, Koskinioti P, Lee SL, Malacrida AR, Manni M, Mathiopoulos K,  
990 Meccariello A, Murali SC, Murphy TD, Muzny DM, Oberhofer G, Ortego F, Paraskevopoulou  
991 MD, Poelchau M, Qu J, Reczko M, Robertson HM, Rosendale AJ, Rosselot AE, Saccone G,  
992 Salvemini M, Savini G, Schreiner P, Scolari F, Siciliano P, Sim SB, Tsiamis G, Urena E,  
993 Vlachos IS, Werren JH, Wimmer EA, Worley KC, Zacharopoulou A, Richards S, Handler AM.  
994 2016. The whole genome sequence of the Mediterranean fruit fly, *Ceratitis capitata*  
995 (Wiedemann), reveals insights into the biology and adaptive evolution of a highly invasive pest  
996 species. *Genome Biol*, 17:192.
- 997 Paradis E, Claude J, Strimmer K. 2004. APE: Analyses of Phylogenetics and Evolution in R  
998 language. *Bioinformatics*, 20:289-290.
- 999 Peloso PLV, Frost DR, Richards SJ, Rodrigues MT, Donnellan S, Matsui M, Raxworthy CJ, Biju  
1000 SD, Lemmon EM, Lemmon AR, Wheeler WC. 2016. The impact of anchored phylogenomics  
1001 and taxon sampling on phylogenetic inference in narrow-mouthed frogs (Anura, Microhylidae).  
1002 *Cladistics*, 32:113-140.
- 1003 Philippe H, Brinkmann H, Lavrov DV, Littlewood DTJ, Manuel M, Worheide G, Baurain D.  
1004 2011. Resolving difficult phylogenetic questions: why more sequences are not enough. *PLoS*  
1005 *Biol*, 9:e1000602.
- 1006 Philippe H, Roure B. 2011. Difficult phylogenetic questions: more data, maybe; better methods,  
1007 certainly. *BMC Biology*, 9:91.
- 1008 Phuc HK, Ball AJ, Son L, Hanh NV, Tu ND, Lien NG, Verardi A, Townson H. 2003. Multiplex  
1009 PCR assay for malaria vector *Anopheles minimus* and four related species in the *Myzomyia*  
1010 Series from Southeast Asia. *Medical and Veterinary Entomology*, 17:423-428.



- 1011 Pond SL, Frost SD, Muse SV. 2005. HyPhy: hypothesis testing using phylogenies.  
1012 *Bioinformatics*, 21:676-679.
- 1013 Portik DM, Smith LL, Bi K. 2016. An evaluation of transcriptome-based exon capture for frog  
1014 phylogenomics across multiple scales of divergence (Class: Amphibia, Order: Anura). *Mol Ecol*  
1015 *Resour*, 16:1069-1083.
- 1016 Prum RO, Berv JS, Dornburg A, Field DJ, Townsend JP, Lemmon EM, Lemmon AR. 2015. A  
1017 comprehensive phylogeny of birds (Aves) using targeted next-generation DNA sequencing.  
1018 *Nature*, 526:569-573.
- 1019 Python Software Foundation. 2017. Python Language Reference, version 3.6.
- 1020 R Core Team. 2016. R: a language and environment for statistical computing. R Foundation for  
1021 Statistical Computing, Vienna, Austria. URL <https://www.r-project.org/>.
- 1022 Rambaut A, Drummond AJ. 2010. FigTree v1.4.2. Institute of Evolutionary Biology, University  
1023 of Edinburgh. Available at: <http://tree.bio.ed.ac.uk/software/figtree>.
- 1024 Rambaut A, Suchard MA, Xie D, Drummond AJ. 2014. Tracer v1.6, available from  
1025 <http://beast.bio.ed.ac.uk/Tracer>.
- 1026 Rezende VB, Congrains C, Lima AL, Campanini EB, Nakamura AM, Oliveira JL, Chahad-  
1027 Ehlers S, Junior IS, Alves de Brito R. 2016. Head Transcriptomes of Two Closely Related  
1028 Species of Fruit Flies of the *Anastrepha fraterculus* Group Reveals Divergent Genes in Species  
1029 with Extensive Gene Flow. *G3 (Bethesda)*, 6:3283-3295.
- 1030 Richardson BA, Page JT, Bajgain P, Sanderson SC, Udall JA. 2012. Deep sequencing of  
1031 amplicons reveals widespread intraspecific hybridization and multiple origins of polyploidy in  
1032 big sagebrush (*Artemisia tridentata*; Asteraceae). *Am J Bot*, 99:1962-1975.
- 1033 Rohland N, Reich D. 2012. Cost-effective, high-throughput DNA sequencing libraries for  
1034 multiplexed target capture. *Genome Res*, 22:939-946.
- 1035 Ruane S, Austin CC. 2017. Phylogenomics using formalin-fixed and 100+ year-old intractable  
1036 natural history specimens. *Mol Ecol Resour*.
- 1037 Sayyari E, Mirarab S. 2016. Fast Coalescent-Based Computation of Local Branch Support from  
1038 Quartet Frequencies. *Mol Biol Evol*, 33:1654-1668.
- 1039 Schrempf D, Minh BQ, De Maio N, von Haeseler A, Kosiol C. 2016. Reversible polymorphism-  
1040 aware phylogenetic models and their application to tree inference. *J Theor Biol*, 407:362-370.
- 1041 Schutze MK, Aketarawong N, Amornsak W, Armstrong KF, Augustinos AA, Barr N, Bo W,  
1042 Bourtzis K, Boykin LM, CACeres C, Cameron SL, Chapman TA, Chinvinijkul S, Chomič A,  
1043 De Meyer M, Drosopoulou E, Englezou A, Ekesi S, Gariou-Papalexidou A, Geib SM, Hailstones  
1044 D, Hasanuzzaman M, Haymer D, Hee AKW, Hendrichs J, Jessup A, Ji Q, Khamis FM, Krosch  
1045 MN, Leblanc LUC, Mahmood K, Malacrida AR, Mavragani-Tsipidou P, Mwatawala M, Nishida  
1046 R, Ono H, Reyes J, Rubinoff D, San Jose M, Shelly TE, Srikachar S, Tan KH, Thanaphum S,  
1047 Haq I, Vijaysegaran S, Wee SL, Yesmin F, Zacharopoulou A, Clarke AR. 2015. Synonymization  
1048 of key pest species within the *Bactrocera dorsalis* species complex (Diptera: Tephritidae):  
1049 taxonomic changes based on a review of 20 years of integrative morphological, molecular,  
1050 cytogenetic, behavioural and chemoecological data. *Systematic Entomology*, 40:456-471.
- 1051 Schutze MK, Bourtzis K, Cameron SL, Clarke AR, De Meyer M, Hee AKW, Hendrichs J,  
1052 Krosch MN, Mwatawala M. 2017. Integrative taxonomy versus taxonomic authority without  
1053 peer review: the case of the oriental fruit fly, *Bactrocera dorsalis*  
1054 (Tephritidae). *Systematic Entomology*.

- 1055 Schutze MK, Virgilio M, Norrbom A, Clarke AR. 2016. Tephritid Integrative Taxonomy: Where  
1056 We Are Now, with a Focus on the Resolution of Three Tropical Fruit Fly Species Complexes.  
1057 *Annu Rev Entomol*.
- 1058 Segura MD, Callejas C, Fernández MP, Ochando MD. 2007. New contributions towards the  
1059 understanding of the phylogenetic relationships among economically important fruit flies  
1060 (Diptera: Tephritidae). *Bulletin of Entomological Research*, 96:279-288.
- 1061 Sim SB, Calla B, Hall B, DeRego T, Geib SM. 2015. Reconstructing a comprehensive  
1062 transcriptome assembly of a white-pupal translocated strain of the pest fruit fly *Bactrocera*  
1063 *cucurbitae*. *Gigascience*, 4:14.
- 1064 Sim SB, Geib SM. 2017. A Chromosome-Scale Assembly of the *Bactrocera cucurbitae* Genome  
1065 Provides Insight to the Genetic Basis of white pupae. *G3 (Bethesda)*, 7:1927-1940.
- 1066 Stamatakis A. 2014. RAxML version 8: a tool for phylogenetic analysis and post-analysis of  
1067 large phylogenies. *Bioinformatics*, 30:1312-1313.
- 1068 Stiller M, Knapp M, Stenzel U, Hofreiter M, Meyer M. 2009. Direct multiplex sequencing  
1069 (DMPS)--a novel method for targeted high-throughput sequencing of ancient and highly  
1070 degraded DNA. *Genome Res*, 19:1843-1848.
- 1071 Swofford DL. 2017. PAUP test-version. Available at  
1072 [https://people.sc.fsu.edu/~dswofford/paup\\_test/](https://people.sc.fsu.edu/~dswofford/paup_test/).
- 1073 Tange O. 2011. GNU Parallel - the command-line power tool. *The USENIX Magazine*,  
1074 February:42-47.
- 1075 The Inkscape Team. 2017. Inkscape v0.91. Available at: <https://inkscape.org/>.
- 1076 Townsend JP. 2007. Profiling phylogenetic informativeness. *Syst Biol*, 56:222-231.
- 1077 Turner EH, Ng SB, Nickerson DA, Shendure J. 2009. Methods for genomic partitioning. *Annu*  
1078 *Rev Genomics Hum Genet*, 10:263-284.
- 1079 Uribe-Convers S, Settles ML, Tank DC. 2016. A Phylogenomic Approach Based on PCR Target  
1080 Enrichment and High Throughput Sequencing: Resolving the Diversity within the South  
1081 American Species of *Bartsia* L. (Orobanchaceae). *PLoS One*, 11:e0148203.
- 1082 van der Walt S, Colbert SC, Varoquaux G. 2011. The NumPy array: a structure for efficient  
1083 numerical computation. *Computing in Science and Engineering*, 13:22-30.
- 1084 Vargas RI, Pinero JC, Leblanc L. 2015. An Overview of Pest Species of *Bactrocera* Fruit Flies  
1085 (Diptera: Tephritidae) and the Integration of Biopesticides with Other Biological Approaches for  
1086 Their Management with a Focus on the Pacific Region. *Insects*, 6:297-318.
- 1087 Virgilio M, Jordaens K, Verwimp C, White IM, De Meyer M. 2015. Higher phylogeny of  
1088 frugivorous flies (Diptera, Tephritidae, Dacini): localised partition conflicts and a novel generic  
1089 classification. *Mol Phylogenet Evol*, 85:171-179.
- 1090 White IM, Elson-Harris MM. 1992. *Fruit Flies of Economic Significance: Their Identification*  
1091 *and Bionomics*. Wallingford, UK, CABI International.
- 1092 Wielstra B, Duijm E, Lagler P, Lammers Y, Meilink WR, Ziermann JM, Arntzen JW. 2014.  
1093 Parallel tagged amplicon sequencing of transcriptome-based genetic markers for *Triturus* newts  
1094 with the Ion Torrent next-generation sequencing platform. *Mol Ecol Resour*, 14:1080-1089.
- 1095 Wiens JJ, Tiu J. 2012. Highly incomplete taxa can rescue phylogenetic analyses from the  
1096 negative impacts of limited taxon sampling. *PLoS One*, 7:e42925.
- 1097 Xi Z, Liu L, Davis CC. 2015. Genes with minimal phylogenetic information are problematic for  
1098 coalescent analyses when gene tree estimation is biased. *Mol Phylogenet Evol*, 92:63-71.
- 1099 Yourstone SM, Lundberg DS, Dangl JL, Jones CD. 2014. MT-Toolbox: improved amplicon  
1100 sequencing using molecule tags. *BMC Bioinformatics*, 15:284.



1102 Table 1. Sample sizes, and average ( $\pm 95\%$  confidence interval) raw reads, reads used to call  
1103 consensus sequences, and recovered loci per subpool and overall (“all”). Statistics excluding  
1104 failed or poor quality individuals indicated with asterisks: \*excluding individuals with  $<100$   
1105 genes, \*\*excluding individuals with 0 genes.

| subpool | N   | raw reads                | consensus reads          | recovered loci       |
|---------|-----|--------------------------|--------------------------|----------------------|
| 1       | 38  | 87,441 ( $\pm 8,298$ )   | 80,851 ( $\pm 7,717$ )   | 740.1 ( $\pm 34$ )   |
| 2       | 146 | 117,947 ( $\pm 12,270$ ) | 109,202 ( $\pm 11,509$ ) | 676.2 ( $\pm 32.5$ ) |
| 2*      | 144 | 119,535 ( $\pm 12,240$ ) | 110,677 ( $\pm 11,485$ ) | 684.8 ( $\pm 30.7$ ) |
| 3       | 113 | 97,190 ( $\pm 15,821$ )  | 92,887 ( $\pm 14,794$ )  | 610.3 ( $\pm 45.2$ ) |
| 2**     | 109 | 100,754 ( $\pm 16,011$ ) | 92,887 ( $\pm 14,794$ )  | 632.7 ( $\pm 41.2$ ) |
| 3*      | 103 | 106,482 ( $\pm 12,859$ ) | 98,177 ( $\pm 15,036$ )  | 666.9 ( $\pm 33.1$ ) |
| 4       | 87  | 73,171 ( $\pm 36,129$ )  | 99,143 ( $\pm 47,468$ )  | 363.7 ( $\pm 70.8$ ) |
| 4**     | 59  | 107,831 ( $\pm 44,083$ ) | 99,143 ( $\pm 47,468$ )  | 536.3 ( $\pm 69.6$ ) |
| 4*      | 50  | 127,110 ( $\pm 58,736$ ) | 116,941 ( $\pm 54,630$ ) | 627.9 ( $\pm 49.1$ ) |
| all     | 384 | 98675 ( $\pm 10644$ )    | 99403 ( $\pm 10374$ )    | 592.4 ( $\pm 27.6$ ) |

1106

1107

1108 Figure 1. Visual depiction of bioinformatic locus selection pipeline. Processes/filtering steps are  
1109 indicated with italics. Sequence visualizations generated with AliView v1.18 (Larsson 2014).

1110

1111 Figure 2. Flowchart of data processing steps. Processing/filtering steps are indicated with italics,  
1112 and boxes indicate intermediate files.

1113

1114 Figure 3. Proportion of amplicons recovered (out of 878) versus the number of reads per  
1115 individual.

1116

1117 Figure 4. a) Proportion of individuals recovered (out of 384) versus amplicon length, and b)  
1118 proportion of Parsimony Informative (Par. Inf.) sites per amplicon versus amplicon length. The  
1119 shape of each amplicons is according to whether they were developed for all-species or  
1120 *Bactrocera*-only, and if their primers contained degenerate bases.

1121

1122 Figure 5. Consensus tree from Maximum Likelihood analysis of 739 conserved exons in peptide  
1123 space (49,528 amino acids in concatenated alignment) for 348 individuals. Genus-level and  
1124 higher classifications are denoted with numbers on nodes, and main nodes that are highly  
1125 supported (SH-aLRT/ultra-fast bootstrap >0.8/0.95) are labeled with white circles (for  
1126 intraspecific node support, see Fig. S5). Shapes at terminal branches indicate species  
1127 identifications, and species that belong to historically difficult species complexes or are  
1128 intercepted in the United States of America, or both, are indicated with boxes around the clades  
1129 and species epithets/complex names (parentheses following species epithet indicates the complex  
1130 in which that species belongs). The *B. dorsalis* complex is the only exception: here, species now

1131 synonymized to *B. dorsalis* are indicated with a box around the clade, other members of the *B.*  
1132 *dorsalis* complex are indicated with grey shapes at terminal branches. Library subpool quality  
1133 (“subpool”, see Methods), pest category based on Vargas, *et al.* (2015) (“pest category”), and the  
1134 percent recovered loci (“%recovered”, out of 878) are displayed on rings around the tree, and  
1135 arrows outside these rings indicate specimens whose data were generated from the data sources  
1136 used in the locus selection pipeline (red arrows indicate “high-quality” annotations). Inset  
1137 photograph of *Zeugodacus cucurbitae* by A.N. Suresh Kumar, used with permission.

1138

1139 Figure 6. Comparison of species trees estimated with three methods: Polymorphism-aware  
1140 phylogenetic model to compared to SVDquartets (left), and SVDquartets compared to ASTRAL-  
1141 II (right). To facilitate comparison, the SVDquartets tree in each comparison is identical. Grey  
1142 dots on nodes indicate bootstrap support <90% in each respective method.

1143



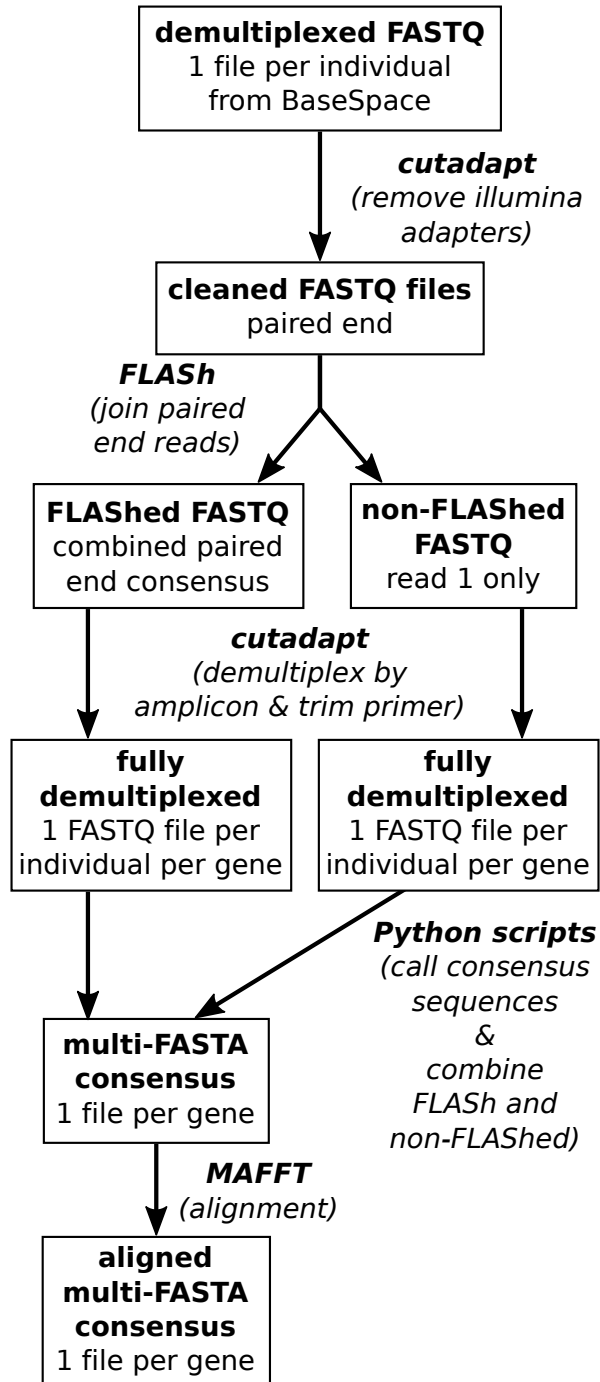

1146

1147 Figure 2.



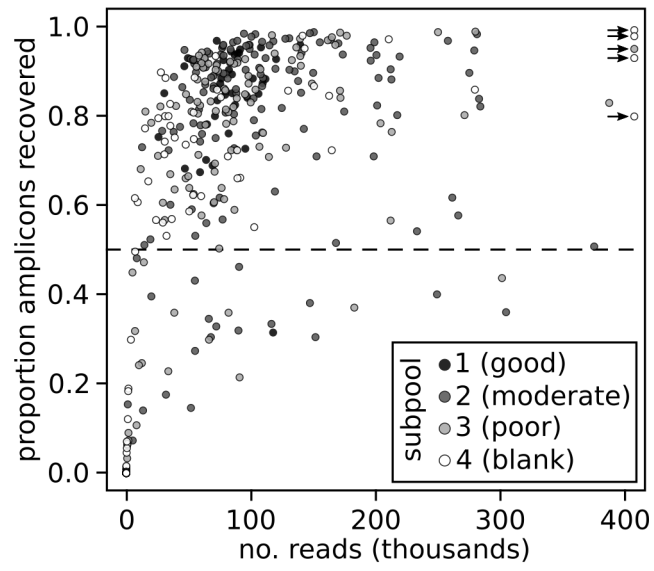

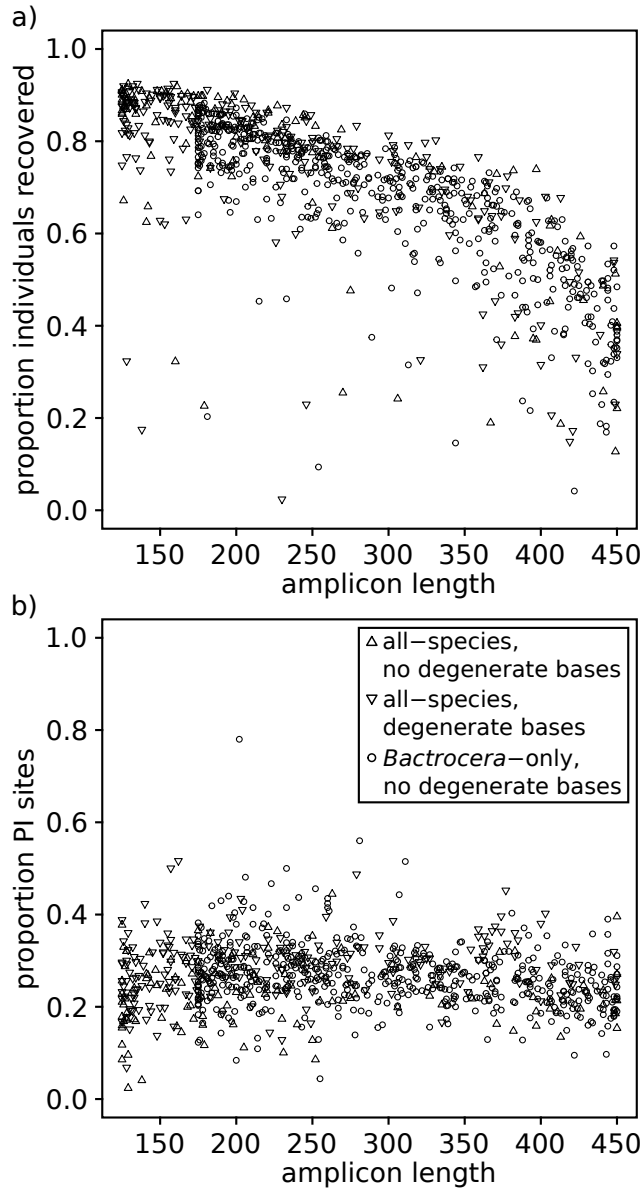

1150

1151 Figure 4.

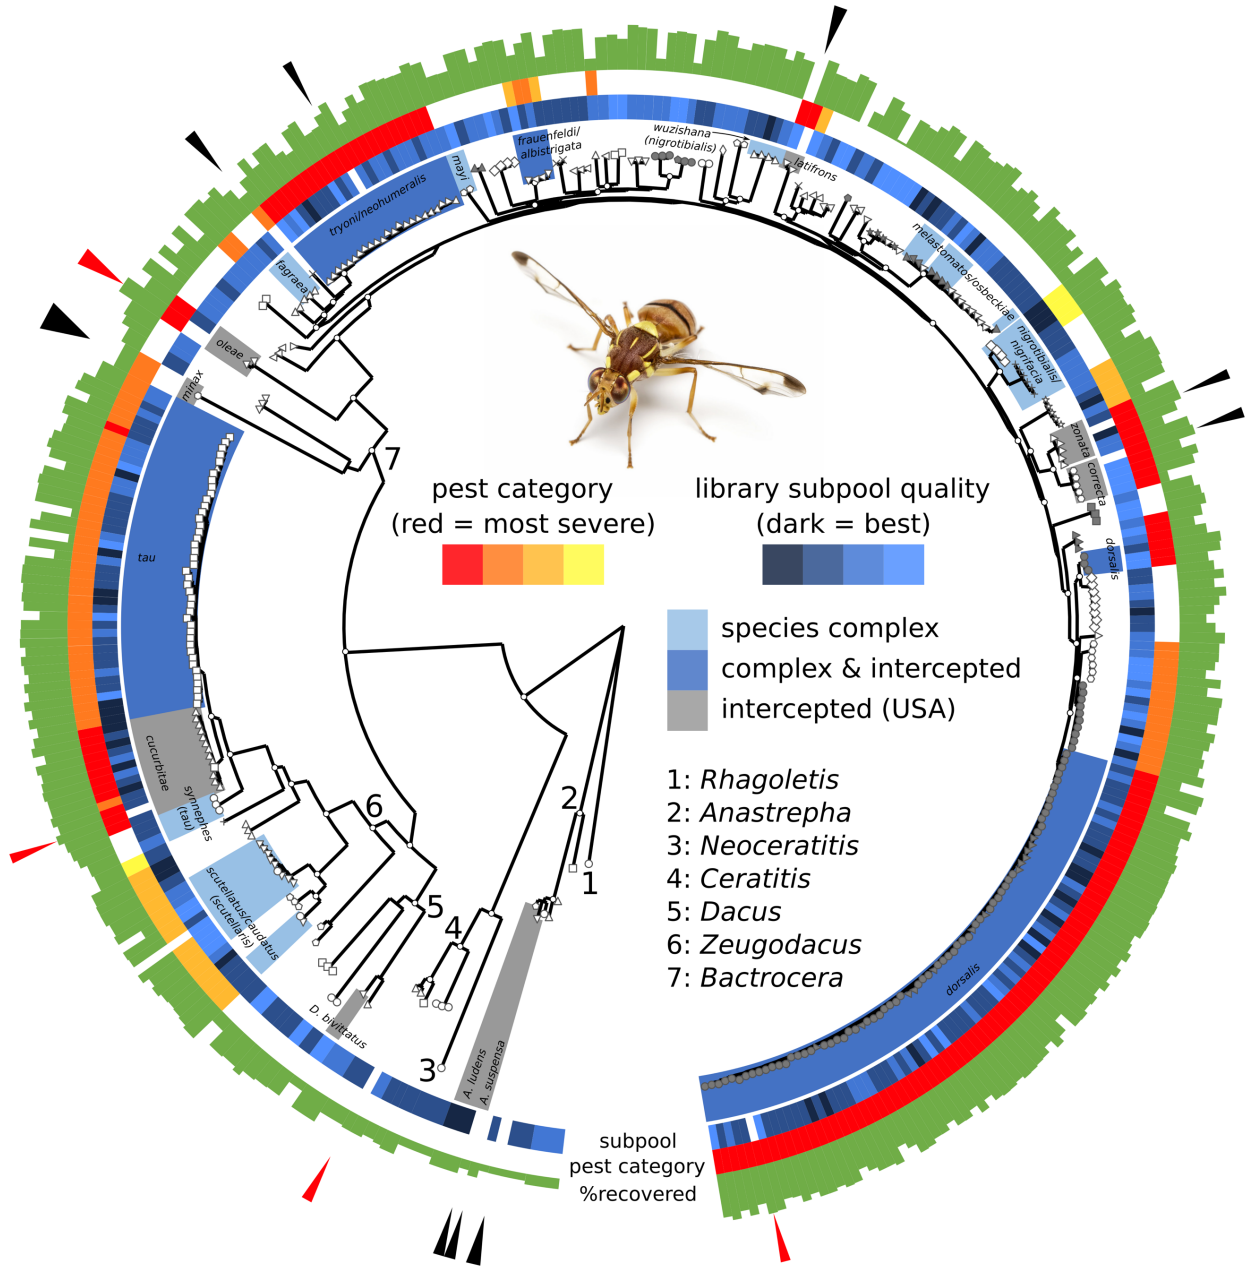

1152

1153 Figure 5.

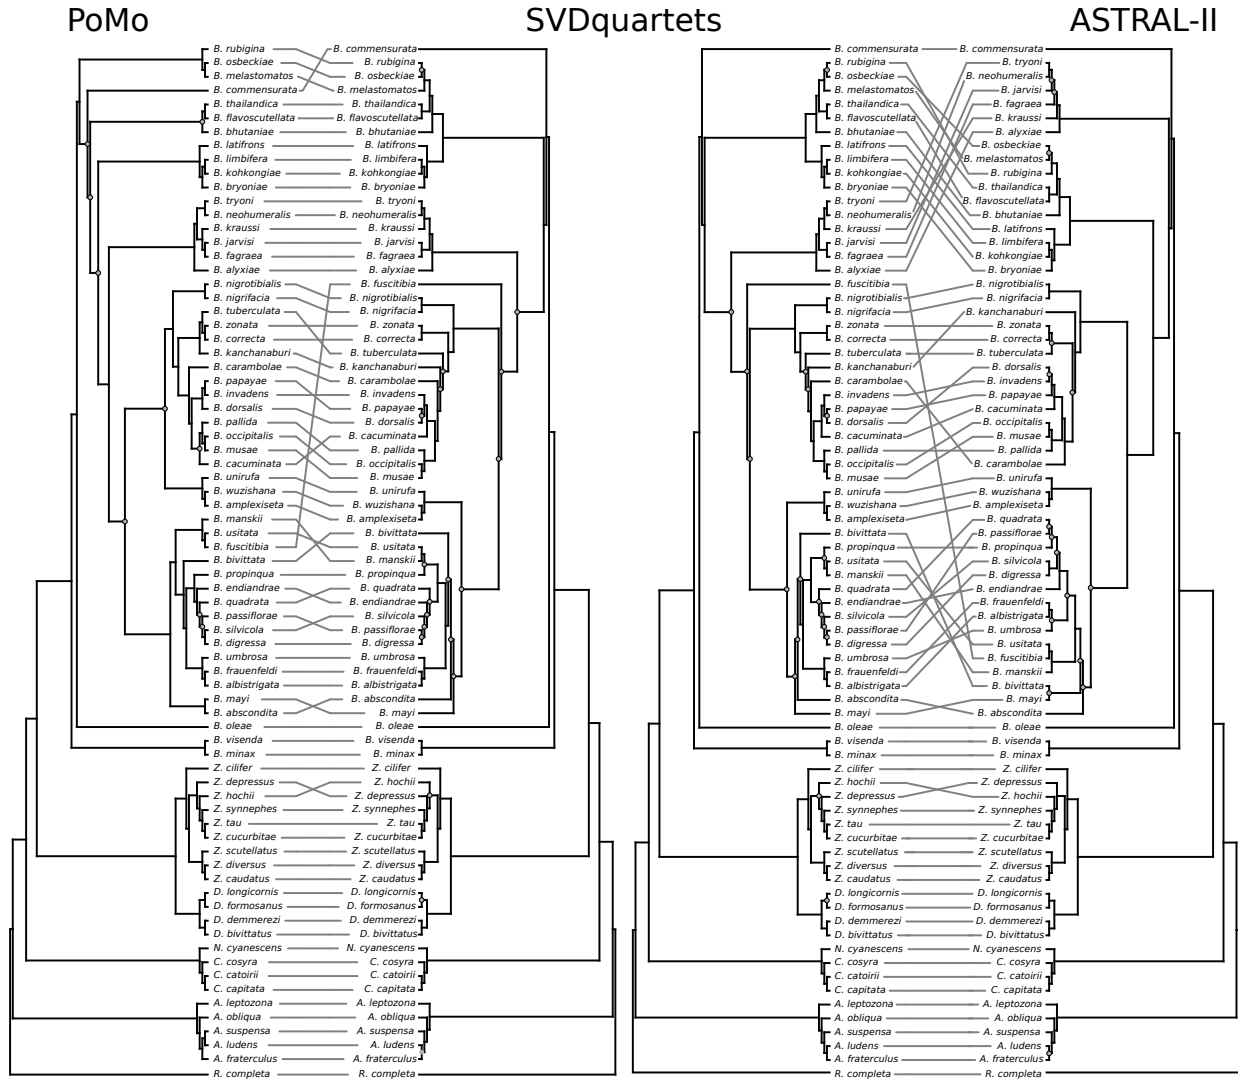

1154

1155 Figure 6.
